# Supplementary material for: Quantum readout and gradient deep learning model for secure and sustainable data access in IWSN
Source: PeerJ Comput Sci. 2022 Jun 6;8:e983. doi: 10.7717/peerj-cs.983 (PMC9202624; doi:10.7717/peerj-cs.983)
Supplement: Supplemental Information 4 [file peerj-cs-08-983-s004.xlsx]

## Sheet: Raw Data
DEMAND_RESPONSE	Area	Season	Energy	Cost	pair no	Distance
2.742	4722.92	4019.64	-1600	13	79	317
1.557	4059.12	2191.03	-1146.08	20	54	165
2.362	4773.56	2787.99	-1263.38	46	67	224
3.892	8271.27	9545.98	-2848.93	26	138	554
4.454	7102.16	14148.8	-2381.15	85	120	809
4.991	7015.24	7336.79	-1699.8	22	95	427
2.655	8620.28	24949.9	-3198.06	35	157	1519
2.811	9238.73	39245.5	-2590	15	196	1885
0	12276.4	59742	-5101	56	249	2826
4.322	14165.5	140950	-1410	82	315	5844
0	7069.95	15336.6	-3000.09	81	133	847
4.524	10768.8	28521	-3732.37	61	214	1469
0	10255.7	66668	-6050	97	207	3048
0	6411.13	9698	-2686	59	104	652
4.339	8766.37	11524.1	-3270.78	44	156	654
3.217	9764.47	51960.7	-2510	16	188	2599
2.504	15208.6	90305.4	-2280	53	223	2059
0	6628.08	6490.83	-1923.04	23	100	485
0	7836.78	5545	-2661	41	126	371
0	10787.8	103850	-4705	85	237	4804
0	7347.39	13978	-3121	24	126	765
3.222	15563.6	110121	-6380	38	322	4619
2.034	5091.81	4269.08	-1520	10	79	317
2.963	3840	1433.37	-606.618	32	40	100
3.682	15435	144972	-5803.6	170	308	6057
1.633	13353.1	40216.5	-1760	43	234	1581
0	18609.3	300553	-12391	73	464	10829
2.885	12024.8	115245	-2020	47	235	4905
0	23099.1	280276	-13215	264	465	8741
2.136	8334.2	9499.81	-2868.48	97	130	490
3.869	11983.7	46065.4	-5543.47	49	273	2061
3.513	18072.9	161030	-8830	91	388	6290
0	13071.6	151812	-6450	66	284	6506
3.342	19248.1	162489	-10600	88	388	6290
0	19217.4	205811	-10695	61	390	6741
1.917	9714.1	33873.2	-2730	56	234	1581
4.117	4911.72	2837.21	-1207.83	47	67	224
3.221	12894.8	60525	-4780	25	247	2754
2.59	10721.5	38062.2	-4162.48	129	205	1751
3.62	10991.8	86042.1	-2960	18	220	3450
3.513	3736.8	1436.3	-634.175	33	40	100
0	5993.3	4806	-1941	18	111	345
0	20309.9	291719	-11688	242	487	10978
0	12888.4	171016	-6821	63	299	7334
2.6	7478.85	14147.7	-2295.22	90	120	809
0	17083.7	94618	-8497	92	365	3633
4.785	9883.77	40847.4	-2722.39	60	159	2181
2.628	5382.92	4179.02	-1499.3	122	88	318
3.672	9454.53	27663.8	-2981.07	101	158	1403
2.401	7325.19	9277.63	-3214.06	21	138	554
4.796	23999.8	456954	-12000	51	483	15505
4.978	10673	26600.5	-3313.23	28	174	1415
1.289	11059.1	68879.1	-5251.84	148	247	3373
2.404	16312.6	115767	-4260	55	271	4426
3.062	9434.08	38959	-4287.95	20	193	2118
3.777	9666.72	33029	-3402.85	87	176	1922
4.682	12626.8	72561.2	-5540.34	47	262	3211
3.393	20368.8	193489	-4900	93	403	6746
2.454	17021.5	164814	-7371.08	65	352	6744
0	12773	70843	-5725	29	210	2894
0	5205.31	4188	-2124	15	88	318
2.802	13768.3	50902.1	-4040	47	234	2464
0	20676.4	244148	-6136	48	368	5025
2.45	23848.5	469672	-10800	59	483	15505
2.941	9564.01	12121.7	-2630.01	92	136	619
1.923	20911.5	163006	-8730	93	449	5537
0	6766.37	7326	-2343	57	108	517
0	8754.11	27397	-4556	13	142	1255
4.332	10106.7	27928	-2735.9	76	158	1403
2.623	17682.4	174076	6300	66	403	6746
4.661	13123.6	78485.7	-5040	63	272	3539
3.951	6910.78	4085.64	-2288.24	70	101	249
0	10201.5	43306	-4973	33	199	2061
2.595	14025.1	92585.3	-5580	50	254	3885
4.949	7976.18	7585.75	-1690	161	109	486
4	11176	18259.1	-3331.32	55	172	973
0	8368.98	26567	-3618	28	165	1524
4.381	9784.19	36750.7	-3060	41	196	1997
0	14703.1	93227	-5737	47	311	3802
3.051	10996.9	87333.1	-2390	14	220	3450
3.972	5757.49	11120.1	-1915.98	21	102	764
2.95	7511.6	14204.6	-2351.32	82	120	809
0	11172.1	48737	-5984	176	233	2325
0	8253.66	22740	-1810	23	138	1206
3.736	6796.84	14057.7	-1527.94	12	96	804
4.552	13128.5	59784.8	-3640	71	223	2822
3.265	10445.5	84668.3	-2010	25	220	3450
2.711	24511	474472	-10700	45	483	15505
4.923	9297.16	30430	-3162.94	116	171	1747
4.764	13011.9	70519.9	-5529.93	42	262	3211
2.422	6726.28	12062.3	-1807.84	8	105	765
4.298	2726.91	52.5799	-430	92	33	5
3.66	13432.5	60792.1	-5420	27	247	2754
0	9756.25	38530	-2126	34	209	1524
0	15547.5	67787	-6540	61	273	2129
3.842	13392.7	79963.8	-5160	48	272	3539
4.713	9282.91	29260.1	-3378.18	31	179	1626
0	19176.5	299930	-10794	87	407	10820
0	6363.31	9414	-2356	34	101	586
1.969	5398.82	4276.59	-717	10	79	317
4.562	12639.7	70542.2	-5318.65	70	262	3211
0	8825.51	35892	-3519	40	175	1868
4.733	11741	52851.3	-4344.44	99	209	2534
3.347	8936.12	28128.2	-2820.32	95	156	1521
4.28	5055.64	2870.85	-1199.41	47	67	224
1.455	9020.21	17476.2	-4127.4	30	183	931
0	8648.61	15678	-3176	77	125	889
4.549	6779.08	12811.6	-1540.87	31	96	804
3.414	24235.6	275831	-12900	83	540	8870
4.49	14257	79237.5	-7189.59	58	320	3466
3.663	8067.24	9426.1	-2960.66	21	138	554
0	5799.93	6030	-1152	12	80	316
0	8087.84	23021	-2302	17	145	1357
4.253	9910	35151.4	-4456.41	129	208	1691
1.584	4208.38	2173.98	-1051.37	20	54	165
0	7383.83	12007	-1608	26	145	768
4.467	9976.33	36430	-4388.08	117	208	1691
1.54	4209.06	2179.4	-1036.21	20	54	165
4.668	4513.02	4068.02	-1363.32	23	72	340
4.567	23288.5	279622	-9205.06	72	468	9276
2.639	9464.38	10028.9	-1660	47	154	587
0	5849.32	4670	-2029	46	95	344
4.961	7368.76	9526.94	-1150	26	102	516
1.932	3867.66	2203.3	-1034.09	21	54	165
4.468	9262.44	28718.5	-3305.19	35	179	1626
2.276	14189.6	59502.1	-6690.93	158	305	2610
3.845	12269.5	57637.3	-2200	37	223	2822
3.49	8513.96	26319.7	-2320	30	156	1364
3.125	9332.9	26774	-2360	31	156	1364
0	14511.3	170352	-8728	40	339	7341
2.007	6819.83	5250.37	-1460	8	79	292
3.085	8802.65	27497.3	-1910	45	156	1364
0	8626.26	21900	-3695	17	147	1018
3.269	13262.2	46178	-5749.48	48	273	2061
2.919	12625.4	79552.2	-4770	37	272	3539
2.554	11889.8	114530	-4270	43	235	4905
3.422	8071.87	14318.6	-1963.13	91	120	809
0	18327.5	175790	-12389	45	430	6635
3.002	13718.2	143417	-6182.51	179	308	6057
2.504	6795.8	12570.1	-1849.35	12	105	765
3.809	10138.3	26292.9	-3235.61	24	174	1415
2.373	7516.98	9270.66	-3089.5	20	138	554
4.034	7588.46	4175.55	-1600	29	86	205
3.595	5347.14	4136.87	-2420	12	79	292
0	13372	190854	-8983	252	350	7945
1.486	11956.1	74055.4	-2910	26	249	3630
3.06	12895.3	60001.1	-5590	26	247	2754
2.062	5600.53	7611.03	-1890.14	75	104	457
3.757	10132.6	32119	-3410.33	76	176	1922
0	8184.05	8281	-4037	16	137	399
2.397	11167.7	112064	-3070	54	235	4905
3.083	10900	37792.9	-3090	41	196	1997
1.643	8374.31	9399.96	-2667.47	98	130	490
4.663	7880.02	8991.08	-1420	21	102	516
0	12895	59376	-6706	42	281	2541
0	12710	88837	-6240	52	302	3891
3.561	26071.4	255509	-7480	94	537	8350
0	12925.8	81599	-6817	62	265	3292
3.154	11197	79880.6	-5720	37	272	3539
2.445	6663.65	4945.65	-2053.07	28	107	346
0	21183.2	324568	-13759	323	482	10983
1.998	3820.78	1454.91	-1014.97	42	52	133
3.631	8445.43	11069.7	-3180.11	36	156	654
4.335	7995.06	9015.01	-2858.76	27	138	554
0	4534.61	3397.19	-1070.32	43	60	243
3.15	4268.21	2013.37	-1076.53	5	63	166
0	6850.9	4364	-2641	19	111	272
1.785	11604.3	34115.6	-3720	51	234	1581
3.455	23904.3	276650	-9670	105	537	8350
0	7799.87	16190	-2635	22	137	810
1.984	6327.04	5299.65	-2070	7	79	292
4.305	13670.9	77654.4	-5432.38	32	262	3211
0	12756	68486	-4464	38	264	2681
0	10707.6	20770	-2326	21	110	655
3.178	12827.8	83655.8	-2990	30	220	3450
1.762	11797.7	34617.4	-2860	22	234	1581
2.558	13869.1	66809.9	-3810	49	224	2192
3.501	13667.8	80111.3	-5450	45	272	3539
0	14366.1	173121	-6332	86	320	6522
1.429	8986.39	17200.1	-4252.16	35	183	931
3.778	10036.3	51996.9	-2640	37	188	2599
1.758	8231.33	9469.98	-2806.49	97	130	490
0	22876.7	414869	-12806	95	509	13313
4.028	6763.03	7251.57	-2400	158	109	486
1.59	7167.38	5621.85	-1840	16	79	292
0	13385.7	158829	-6132	65	306	7090
4.016	5410.99	4273.35	-1750	21	85	343
0	12833.3	146095	-5999	61	317	6400
3.499	8902.07	24049.4	-2939.3	24	154	1252
0	10832.4	47380	-5304	60	201	2316
1.535	3926.41	2174.68	-1130.91	20	54	165
0	4883.25	3228	-1698	11	72	226
4.845	8628.43	29360.4	-1997.39	35	132	1513
0	4087.59	2310.6	-1042.97	22	54	165
4.704	11423.5	39269	-3990.33	110	205	1751
2.213	20644	173815	-5490	101	449	5537
2.041	3954.47	1444.89	-1003.39	42	52	133
0	11409	33376	-3886	24	168	1211
3.249	8678.42	25827.7	-2420	28	156	1364
0	12856	95849	-6398	44	259	4146
2.095	3838.69	1444.28	-1005.58	42	52	133
3.476	9585.89	26095.7	-3396.21	27	174	1415
2.131	3959.56	1472.27	-946.372	42	52	133
3.729	5208.86	3135.02	-1179.71	37	67	224
0	14581.8	112831	-8850	60	338	4723
0	13324.1	137340	-5968.22	176	279	5626
3.17	10725.9	37881.7	-4077.25	112	205	1751
2.209	5465.85	4221.11	-1493.68	122	88	318
4.626	9944.07	36296.1	-3820	43	196	1997
0	11366.8	55567	-6302	122	237	2679
4.267	6164.25	7671.4	-2200	18	102	516
3.535	14388.7	67810.7	-3400	58	224	2192
4.771	23304.3	278144	-9721.79	71	468	9276
1.681	6856.01	5413.24	-2170	8	79	292
2.162	16317.7	137623	-9070	83	449	5537
2.772	10556.3	49268.8	-5010	26	216	2677
2.034	13693.2	45616.8	-2480	42	234	1581
4.091	21684.6	514203	-12439.8	133	540	18067
3.248	9005.99	12426.5	-2672.12	93	136	619
0	8060.63	29645.5	-3969.08	42	179	1626
4.123	17060.9	190062	-6680	53	390	7459
3.687	9269.4	26717.1	-3419.42	45	174	1415
0	7227.66	13730	-2369	28	120	813
0	7056.68	11808	-4137	27	115	803
4.773	12650.3	46367	-5934.87	63	273	2061
3.28	9388.22	27247.8	-2924	94	158	1403
0	15584.2	246354	-6758	64	360	8725
2.228	6410	5179.39	-2380	57	79	292
2.967	8588.78	26821.5	-2540	33	156	1364
0	15496.8	128042	-8414	251	325	5739
0	16746.5	59076	-11599	90	354	2330
0	8355.73	21771	-3423	73	156	1211
3.556	7477.83	4889.23	-1960	19	86	205
4.03	11109.5	43303.4	-3370	20	196	1885
4.629	9516.41	37831	-3576.71	52	180	2054
3.865	4456.48	3060.4	-1245.17	31	71	249
4.586	9903.3	36390.2	-4830	35	196	1997
4.16	22571.5	516371	-10921.9	113	540	18067
0	9063.3	23613	-3635	24	158	1258
3.455	5221.12	3526.35	-789.216	49	51	132
3.477	13138.9	89889.3	-5580	62	254	3885
0	16658.2	137142	-8453	83	375	5426
0	11214.7	81200	-7183	140	253	3970
2.213	12404.3	73728.5	-3780	29	249	3630
2.462	24545.8	471687	-13800	35	483	15505
1.007	2478.68	51.0363	-559	6	33	5
3.821	8718.89	11511.4	-3327.88	42	156	654
2.925	10631.9	27523.1	-4207.29	38	214	1469
2.493	13019.7	114306	-3180	39	235	4905
2.497	9121.26	10166.8	-2290	33	154	587
0	5925.06	7643	-3609	11	108	487
3.213	13540.8	51676.6	-2870	44	234	2464
3.57	19548.5	161497	-8910	88	388	6290
2.203	4585.12	4104.16	-1370	15	79	317
3.267	10102.4	49292.3	-5120	42	216	2677
2.167	13560.7	139655	-5720	31	315	5844
4.119	25436.6	281385	-11500	83	540	8870
4.547	10435.6	28705.8	-3804.91	73	214	1469
3.9	7639.75	15775.9	-2729.66	74	134	970
2.256	12830.7	115169	-2980	43	235	4905
2.463	10364.4	59120.7	-4535.66	98	217	2904
0	11223.7	91969	-4929	41	230	4241
4.791	20184.2	183128	-4240	78	403	6746
0	6772.75	7659	-4207	12	109	484
4.044	8704.7	11131.3	-3080.58	37	156	654
1.747	5536.04	4149.42	-1548.34	123	88	318
3.832	4990.86	3275.41	-1162.53	29	71	249
0	11796.1	53810	-3978	34	235	2460
1.463	3974.61	2203.07	-1147.9	22	54	165
0	12402.8	75233	-6065	76	248	3538
4.33	9293.86	13624.8	-2839.02	16	148	729
2.957	4359.93	2059.16	-1060.72	7	63	166
2.371	6123.31	4963.28	4910	29	85	343
4.451	16071.1	192851	-9540	53	390	7459
2.637	13097.7	79842.1	-7020	42	272	3539
3.771	5189.83	4370.62	-1490	20	85	343
3.376	11254.4	43140.8	-2140	68	223	2059
2.395	10084	10370.1	-1890	39	154	587
1.64	8130.62	11988.4	-2560.04	83	128	693
4.914	5559.51	10634.7	-2005.96	33	102	764
0	8627.92	9540	-2159	44	134	487
3.474	18349.8	161641	-11500	87	388	6290
4.094	18448.4	202825	-8580	51	390	7459
0	13224.3	82194	-9924	102	330	3715
4.67	14395.8	79281.5	-7271.55	66	320	3466
2.228	16106.6	137559	-9240	83	449	5537
0	12905.3	66038	-8059	60	286	2901
2.609	6865.16	9301.76	-3209.6	22	138	554
0	7751.4	9454	-1967	14	141	584
1.141	5756.71	4789.96	-1320	20	85	343
0.758	9154.7	16925.5	-4320.51	37	183	931
1.46	12181.7	73788.1	-4410	21	249	3630
4.225	10320	35123.2	-4472.45	125	208	1691
0	9972.31	22175	-4675	33	184	1210
0	18112.1	219938	-11279	80	380	7226
0	8162.41	10459	-3456	12	114	549
4.409	10362.8	30853.9	-3004.41	99	171	1747
0	9747.68	32137	-5479	44	165	1690
4.688	6380.73	7437.4	-2150	158	109	486
3.311	7058.34	9603.81	-2517.39	19	123	621
4.698	4907.6	3015.32	-1230.76	42	67	224
4.464	13138.2	52427.9	-6124.04	56	288	2334
2.671	9552.34	16681	-3841	88	172	973
3.615	11995.1	87520.3	-2280	18	220	3450
3.82	8132.28	9525.59	-2889.77	19	138	554
4.712	14103.9	102425	-5685.63	150	281	4061
0	5304.7	4505	-1884	15	97	322
2.953	13806.9	141333	-4710	49	315	5844
2.909	13720.3	141887	-5280	41	315	5844
0	16725.1	197745	-10893	318	388	7460
2.109	4007.73	1456.39	-961.918	42	52	133
4.342	5586.67	1782.69	-1427.63	15	76	147
3.801	10943.3	27206	-584	34	166	1111
3.069	5079.37	3067.15	-1182.62	38	67	224
2.684	5345.81	4452.99	-1100	20	88	292
4.391	9566.74	27102.4	-1380	22	166	1414
3.512	5682.13	4117.44	-1479.35	124	88	318
0	12736.7	75832	-5688	32	242	3060
4.212	10370.6	57372.2	-3780	48	223	2822
3.375	21884.5	410997	-8370	62	473	14125
3.8	20444	192110	-4560	90	403	6746
3.268	15702.8	115053	-4570	70	271	4426
0	7827.7	7481	-2187	7	97	400
4.331	5143.99	4398.6	-1660	13	79	292
1.149	2406.77	50.8227	-667	8	33	5
2.719	7860.77	9229.4	-3097.47	18	138	554
4.632	7756.73	4711.47	-2762.2	27	131	271
3.04	9259.58	27517	-3280	27	194	1521
2.9	14685.7	52757.5	-2660	38	234	2464
0	12770.9	74941	-6169	26	230	3288
1.61	8306.72	12053.4	-2598.95	89	128	693
1.464	3853.74	2149.74	-1167.6	22	54	165
1.973	4009.37	1446.68	-961.242	42	52	133
3.476	12857.6	52380.4	-5090	16	215	2188
1.559	3987.88	2192.73	-1148.48	20	54	165
2.682	9406.46	22695.2	-2250	11	166	1111
1.604	7434.75	5689.3	-1260	16	79	292
2.727	12939	74465.9	-4230	26	249	3630
0	4554.31	921	-670	7	53	72
4.686	7852.53	7042.29	-2016.04	36	108	428
2.207	12685.2	74685.3	-3380	25	249	3630
2.316	5978.39	7675.44	-1735.06	72	104	457
0	6790.71	4089.3	-2574.81	73	101	249
1.316	2475.05	52.7779	-596	8	33	5
3.305	7472.41	14097.5	-2358.41	96	120	809
3.656	10427.8	49118.6	-4490	26	216	2677
3.667	6477.57	7392.17	-1457.71	36	93	545
2.472	19954.4	243924	-11900	98	537	8350
1.367	10303.7	67843.8	-5537.81	143	247	3373
2.539	13364.7	90465.4	-4010	44	254	3885
0	10984	43581	-6839	191	230	2061
4.51	14337.6	108191	-7580	55	322	4619
2.023	6378.62	13390.1	-1612.26	16	96	804
2.024	8120.38	26166.5	-3110	32	156	1364
0	14718.2	134636	-8450	44	311	4925
2.372	10095.3	10451.8	-1490	32	154	587
0	9762.95	64812	-5319	33	220	3203
3.096	13282	75698.3	-3490	35	249	3630
0	4652.18	1101	-528	14	67	74
0	13245.3	89249	-7661	51	267	3889
0	19058.8	186884	-11048	92	439	6521
2.568	5854.15	7370.16	-1666.65	54	93	545
0	11353.1	80131	-8135	166	279	3798
2.376	5864.46	7671.02	-1833.55	76	104	457
4.88	5760.12	11109.3	-1866.49	41	105	765
4.259	14477.5	96071	-5727.76	51	294	4249
4.417	4483.99	2583.83	-1197.91	38	67	224
2.523	16206.8	115998	-4810	63	271	4426
3.598	10946.8	86138.8	-3400	33	220	3450
4.657	8944.21	29057.2	-3368.25	35	179	1626
4.934	5259.65	4773.61	-1249.39	17	72	340
0	14504.1	104172	-1876	50	339	4439
5	9361.69	12592.1	-2543.56	75	136	619
0	11202.1	35439	-5864	41	270	1643
4.232	9603.46	27772.1	-2922.91	100	158	1403
4.828	8700.82	17284	-2718.01	77	142	844
3.243	8414.71	17111	-2896.77	83	142	844
2.017	5040.31	3804.6	-1150	13	79	317
4.258	12731.4	55797.2	-3500	64	224	2192
4.198	9238.75	20452	-3458.78	89	163	1162
0	7929.02	8877	-3570	14	129	521
0	5598.91	1102	-826	24	66	63
4.353	6259.88	6646.73	-2710	21	119	395
2.777	7801.68	13927	-2130.12	43	120	809
2	13597.5	41770.7	-2850	50	234	1581
1.57	4044.93	2195.63	-971.394	20	54	165
0	17549.8	190154	-9967	322	374	6633
2.65	9240.35	10029.9	-1380	29	154	587
3.217	11409.4	50480.1	-5440	24	216	2677
0	11100.4	76049	-7498	46	244	3706
0	6145.48	9138	-2117	7	105	581
1.887	12171.1	74748.9	-4380	27	249	3630
2.702	13218.6	51446.8	-2770	44	234	2464
2.662	11898	46156.3	-4970	21	215	2188
1.743	4548.93	2819.88	-1394.68	52	67	224
0	11002.8	70251	-6125	110	223	3209
0	7334.17	6997	-3343	15	121	397
3.05	20675.4	244859	-12900	82	540	8870
0	9868.87	35005	-3824	32	204	1934
4.46	10073.2	27186.4	-2816.2	77	158	1403
4.917	10641.6	38424.7	-3866.32	110	205	1751
0	9625.67	29224	-3403	24	170	1467
0	15715.5	168482	-7908	59	390	6294
0	9309.07	72643	-4931	36	216	3454
0	7143.43	17970	-3996	2	110	806
0	6661.86	5361	-2139	5	82	244
2.282	5936.43	7666.13	-1818.38	74	104	457
4.762	11007.7	58003.8	-3730	34	223	2822
0	13865	70582	-5621	45	270	3130
0	10648.7	53396	-5518	43	210	2383
2.374	5892.81	4915.01	16900	29	85	343
0	15098.8	66975	-4212	40	229	2603
1.549	6310.09	5432.27	-2380	16	79	292
4.106	15649.6	141759	-3510	63	315	5844
2.69	4674.13	3944.51	-1210	13	79	317
3.987	5356.78	2237.33	-1627.29	18	82	185
0	11168.3	64955	-6410	156	222	3290
4.76	7813.38	9183.57	-1000	24	102	516
0	12202.2	41137	-6143	36	216	1754
1.985	13812.6	139512	-4850	47	315	5844
3.407	8122.78	5330.75	-1360	29	86	205
3.218	12953.8	60657.5	-5130	24	247	2754
4.398	8872.56	28649.6	-3410.33	36	179	1626
0	11597.3	39536	-5602	60	229	2127
0	13401.8	61361	-8372	147	314	2836
0	6366.8	2459	-1312	8	68	130
3.49	9388.91	25747.5	-3358.44	33	174	1415
4.508	14291.1	65271.8	-2140	61	223	2822
3.722	9615.02	25822.5	-3391.89	25	174	1415
0	10254.9	39993	-5223	32	192	1865
4.55	9679.76	29836	-3194.26	106	171	1747
0	9527.61	25180	-2843	29	186	1414
2.989	11133	26813.1	-4137.09	41	214	1469
2.539	16066.4	115345	-3890	51	271	4426
0	8008.15	12458	-3366	24	169	695
2.745	13244.2	90867.7	-4580	41	254	3885
4.222	13690.2	52665.7	-6117.45	48	288	2334
2.955	12682.8	74450.8	-4240	26	249	3630
3.48	2654.25	50.1395	-560	6	33	5
4.664	4741.31	2407.48	-842.001	44	51	132
4.172	8906.23	20582.5	-3497.77	92	163	1162
0	12462.7	109412	-5505	21	284	4617
3.696	6626.46	10442.1	-3180	16	109	689
2.613	7424.17	5241.91	-2380	23	86	205
3.934	8951.77	11323.5	-3143.73	52	156	654
1.797	11376.6	32234.5	409	40	234	1581
1.059	2586.38	47.7134	-336	6	33	5
1.614	4179.65	2190.45	-919.427	20	54	165
1.732	7818.65	9476.29	-2975.24	96	130	490
4.772	14388	95056.9	-5910.85	58	294	4249
0	19923.7	301046	-8462	80	445	10102
2.494	15079.9	117879	-6610	55	271	4426
1.53	4095.87	2250.05	-1080.5	20	54	165
0	7200.48	21532	-2783	186	146	1308
0	14156.9	135304	-9469	206	312	5731
2.689	23867.2	470143	-12400	50	483	15505
2.631	9437.37	39537	-1800	11	196	1885
0	19262.6	260781	-11947	262	424	9408
2.532	8200.54	11748.7	-2525.3	86	128	693
0	7678.78	12467	-3029	10	133	803
3.548	9711.58	12594.5	-2579.86	85	136	619
3.729	8696.07	11055.3	-3199.2	29	156	654
4.822	18162.8	202432	-7950	61	390	7459
3.062	4157.84	1932.93	-1084.97	4	63	166
4.324	11192.5	42299	-2450	28	166	1414
4.586	9943.07	34145	-3436.39	92	176	1922
1.211	6056.62	5194.69	-1460	21	85	343
2.107	11070.1	73612.8	-5440	19	249	3630
3.529	4530.17	3294.57	-1222.36	36	71	249
0	8164.92	10384	-2820	52	132	658
2.816	22272.6	414308	-6940	68	473	14125
0	12758.1	62379	-5684	46	237	2746
2.098	19208.4	150697	-9030	74	449	5537
3.698	25362.7	474761	-11300	52	483	15505
3.883	7107.27	4038.1	-2278.19	70	101	249
0	10635.8	34152	-5527	66	184	1691
2.505	11750.3	44735.6	-3110	46	223	2059
2.814	8563.17	24941.5	-3157.75	38	157	1519
4.32	8250.17	9376.3	-2854.38	23	138	554
4.908	14217.3	78604.5	-7117.31	80	320	3466
4.235	8976.19	12457.1	-2441.02	57	136	619
1.61	11408.7	73530.7	-5340	26	249	3630
0	10116.6	8766	-2512	19	138	400
3.576	8536.43	9470.7	-2953.96	100	130	490
4.251	8353.33	4602.88	-2677.06	26	131	271
1.853	5154.16	3422.31	-793.939	50	51	132
4.479	5898.7	10981.1	-1789.77	32	102	764
4.518	5814.6	11133.1	-1958.78	25	102	764
1.742	9758.43	20341.6	-2486.65	69	163	1162
4.027	2471.38	50.0522	-489	94	33	5
3.701	12432.4	92219.9	-4920	63	254	3885
3.005	13078.1	59655.6	-5380	25	247	2754
2.218	7314.21	9476.03	-2484.88	13	123	621
3.511	9441.23	26259.5	-3367.83	29	174	1415
4.647	7819.98	4634.86	-2744.3	31	131	271
2.34	10329	10328.6	-2320	36	154	587
0	13495.6	116247	-6978	48	330	4627
3.017	11866.8	75220	-4350	25	249	3630
0	5400.55	12154	-1857	10	93	842
3.166	20693.5	240604	-6140	98	537	8350
4.411	8750.48	9768.44	-2735.34	15	138	554
4.366	9081.1	17122.2	-3698.56	39	183	931
1.647	12243.5	73427	-3860	29	249	3630
2.667	21518.7	242311	-10500	104	537	8350
2.033	5864.34	7232.32	-1646.52	50	93	545
2.675	4839.23	2999.9	-1215.28	44	67	224
3.555	11421.1	27060	-762	35	166	1111
4.275	23539.3	521716	-11394.2	143	540	18067
0	14427.1	57684	-6588	47	302	2537
4.349	13876.3	62082.5	-2730	56	223	2822
4.042	7776.13	9537.15	-2798.49	38	138	554
4.212	2376.63	50.2179	-560	92	33	5
2.848	11621.7	78331.6	-7410	40	272	3539
4.307	9189.37	13634.2	-2858.77	16	148	729
0	13037.8	119751	-5981	48	261	4517
3.318	24079.6	255885	-7840	92	537	8350
4.1	6056.15	11207	-1868.54	14	102	764
1.672	11409.7	73756.6	-5290	24	249	3630
3.11	14771.1	142495	-3880	46	315	5844
0	13504.8	62330	-7140	13	187	1928
4.978	7809.96	12552.2	-2775.33	88	130	694
1.112	5984.86	4684.18	-1010	22	85	343
2.552	5489.41	3545.77	-750.43	46	51	132
4.356	2761.39	51.7655	-388	92	33	5
2.21	3823.77	1477.82	-991.843	42	52	133
0	11849	26594	-6014	37	192	1208
0	10433.5	57935	-4304	23	221	2824
4.649	8608.3	19573.6	-2697.6	90	151	1023
3.059	9408.37	27442	-2905.23	91	158	1403
0	16159.2	113629	-7506	72	378	4731
0	7214.29	8242	-2144	16	117	457
4.032	9021.87	28025.4	8220	29	166	1414
2.03	13711.3	47455	-2090	51	234	1581
1.049	5775	4771.38	-1460	21	85	343
0	27093	1005950	-20576	198	715	30042
3.465	7224.2	15659.5	-2636.71	70	134	970
0	6977.83	4124	-3333	47	112	292
0	21874	98011	-7816	92	436	3305
4.845	9627.81	36016.8	-4600	42	196	1997
0	29018.8	814047	-18392	186	753	20648
3.085	8424.32	51426.8	-3360	36	188	2599
1.205	5827.88	4772	-914	23	85	343
0	16541.8	142461	-10712	309	387	5428
3.755	10865.9	39342.2	-3934.64	26	193	2118
4.636	10652	27457.8	-4406.64	56	214	1469
3.874	9789.85	26617.4	-3345.54	32	174	1415
3.74	9301.52	11334.8	-2947.54	34	156	654
1.702	6681.49	9249.31	-3308.3	16	138	554
3.854	9018.74	27898.6	-2350	19	166	1414
3.103	14591.8	59810.2	-6648.95	157	305	2610
2.506	13394.9	50782.6	-3440	76	234	2464
2.694	24861.1	263742	-8920	102	537	8350
0	7076.03	7333.25	-2509.39	16	122	429
1.737	11954	114599	-2330	41	235	4905
0	13424.3	139083	-8246	150	326	6508
2.847	8169.22	11978.8	-2552.44	82	128	693
2.837	9660.44	39277	-2190	21	196	1885
2.782	24203.2	270592	-8570	102	537	8350
4.43	8804.33	27963.6	-2819.72	94	156	1521
2.589	14193.6	52252.6	-3030	34	234	2464
2.584	5469.77	2774.29	-1135.92	40	67	224
2.185	5778.87	7569.3	-1883.27	77	104	457
0	32956.9	509795	-19912	154	782	14166
3.725	14416.2	51256.1	-3710	48	234	2464
0	13851	97433	-6459	85	270	3796
4.093	23333.9	284119	-15700	70	540	8870
3.906	9504.96	12630.1	-2512.83	88	136	619
4.218	10523	50974.9	-4556.32	120	209	2534
0	3667.89	1830.27	-1254.23	7	63	166
0	25488.7	674161	-23313	92	725	20240
0	6279.92	2887	-2615	3	110	166
4.535	9031.34	20500.1	-3419.77	81	163	1162
0	18386.1	305592	-11749	201	428	11269
4.529	9710.51	30534.6	-3177.42	117	171	1747
4.368	9046	13687.6	-2890.13	14	148	729
0	12232	83120	-7431	41	332	3638
3.788	7303.28	4017.06	-2334.26	70	101	249
3.443	4934.37	4383.61	-1344.15	21	72	340
0	19078.9	115932	-8056	63	405	4071
4.476	10125.3	28563.3	-2570	26	194	1521
2.635	13200.8	47551.1	169	45	223	2059
0	8862.58	18382	-4782	62	164	1019
3.835	4809.19	4417.42	-1180	11	79	317
1.59	4000.39	2215.9	-1056.31	24	54	165
0	10245.7	39694	-5506	236	191	2119
2.4	5608.82	4196.28	-1170	12	79	317
0	7066.77	12822	-1810	12	129	808
0	5092.22	4613	-1623	8	94	313
0	8292.36	19094	-3691	58	162	1206
0	8070.5	21314	-2858	22	145	1109
0	7907.16	10368	-2517	25	144	619
0	8921.63	16699	-3202	17	108	486
2.634	21426.5	195815	-6270	68	403	6746
3.529	10703.5	10140.8	-1630	34	154	587
2.488	7044.87	13932.3	-2428.82	91	120	809
1.922	6720.76	5328.69	-2030	9	79	292
3.516	13248.8	60886.5	-3320	30	247	2754
4.408	14484.5	143616	-5995.49	157	308	6057
4.23	8735.98	27778.9	-2826.17	94	156	1521
2.865	15570.6	116371	-4880	51	271	4426
4.802	3768.76	1172.52	-831.422	30	51	102
2.216	6394.53	13350.1	-1568.05	15	96	804
3.326	12721	116199	-4020	39	235	4905
0	8664.9	21422	-4481	31	165	1305
4.254	16682.6	143687	-7207.49	175	362	5847
4.774	8435.42	13576.6	-2614.35	22	132	806
3.627	24089.1	262192	-12000	87	540	8870
0	14220.2	115403	-7946	46	323	4920
0	9628.76	29902	-5093	98	178	1634
3.021	17981.6	172276	-6970	87	403	6746
2.1	19755.8	409617	-11600	63	473	14125
1.607	12083.6	73304.2	-4430	30	249	3630
3.95	8365.67	9604.68	-2907.17	22	138	554
0	14801.3	164892	-8297	197	330	6520
4.763	12579.6	71755.5	-5610.01	31	262	3211
0	4055.36	5888	-1044	20	68	481
4.828	14825.5	80709	-6969.73	79	320	3466
1.915	4552.02	2231.54	-827.734	24	54	165
1.412	5260.89	4275.34	-1450	17	88	292
4.045	22996.6	517731	-11446.9	123	540	18067
4.287	9873.69	34804.4	-4416.26	120	208	1691
2.144	8458.75	19830.7	-3547.9	87	163	1162
3.474	9390.24	26582.3	-2210	67	166	1414
2.299	4735.26	3979.56	-1240	15	79	317
3.312	14051.3	60594.5	-5130	23	215	2188
2.815	4314.17	1954.68	-1083.85	5	63	166
0	29522.8	762649	-19830	146	718	22296
0	16318	210590	-10706	52	365	8077
3.55	9801.17	27540.5	-2850.33	102	158	1403
3.781	6085.49	11794.9	-1939.08	11	105	765
2.938	10831.5	38480.2	-4170.23	119	205	1751
2.514	10012	38428.4	-4134.91	15	193	2118
0	20831.8	210073	-7060	80	327	5215
2.948	8733.6	12095.4	-2659.16	86	136	619
3.108	8763.84	16796.1	-2812.48	82	142	844
0	9147.41	39660	-4400	80	202	2124
0	8528.23	17259	-3365	64	144	844
4.431	9088	22896.3	-4780	40	182	1212
0	5462	5518	-2216	20	93	320
4.353	13285.8	60281.9	-2400	35	223	2822
2.39	7025.08	5246.18	-2091.07	58	107	346
2.712	9594.94	23053.1	-1020	16	166	1111
3.239	11324.6	50307.3	-5570	27	216	2677
0	16720.2	133299	-6722	70	349	5329
4.127	11613.8	42959.5	-1330	54	223	2059
3.29	8703.42	12586.2	-2447.09	65	136	619
0	10861.9	43273	-8498	112	231	2188
0	5743.9	3670	-2710	11	96	273
0	20346.2	451497	-14199	113	581	15338
2.887	5147.75	3478.04	-790.805	50	51	132
1.97	7787.46	4323.71	-1860	10	86	205
0	13716.3	52042	-9051	47	306	2255
2.287	24501.9	472379	-12600	44	483	15505
2.755	9000.64	25077.5	-3127.62	34	157	1519
1.843	5255.95	3495.31	-844.729	50	51	132
3.228	8535.96	13514.6	-2970.68	14	148	729
3.097	9373.94	39216.3	-2150	19	196	1885
3.72	12580.2	93941.6	-3060	27	220	3450
3.09	5313.22	4309.04	-1250.53	24	72	340
4.096	8787.16	20778.6	-3470.08	92	163	1162
0	7058.96	18564	-4310	23	149	1109
3.79	16206.7	145202	-7481.07	181	362	5847
3.817	11265.7	30905.5	-899	31	166	1111
0	10019.7	43592	-4865	29	200	2392
0	17940.9	135164	-11251	251	388	4827
2.459	8364.22	10480.5	-2891.94	98	139	587
0	6490.39	6538	-2743	38	113	425
1.694	5792.48	4238.4	-1581.93	126	88	318
3.315	5954.81	4296.1	-1377.05	120	88	318
3.563	13801.7	50351.6	-1300	67	223	2059
2.727	11197.9	78141.2	-8060	39	272	3539
4.046	12430.6	93230.1	-6590	59	254	3885
3.999	22605.5	410715	-8280	68	473	14125
4.667	14168.2	94226.5	-5830	67	254	3885
4.295	7074.99	4139.57	-2334.4	69	101	249
1.557	11906.8	73852.8	-4010	30	249	3630
4.64	9253.03	26983	-2770	32	166	1414
3.013	10748.7	83878.2	-2210	24	220	3450
4.27	6454.88	13768.5	-1534.32	20	96	804
4.513	7636.29	16480.6	-2629.67	81	134	970
3.813	11185.7	58393.6	-3440	43	223	2822
3.88	18011.8	198454	-8530	46	390	7459
4.734	14023.7	139739	-5963.84	166	308	6057
0	9832.53	26728	-1704	15	157	1116
0	7165.28	13299	-4447	59	135	770
0	7943.07	11931	-2090	31	131	805
3.148	8973.96	26629.6	-2490	39	156	1364
0	27786.2	622142	-12100	112	607	16234
3.581	14553.7	147106	-6098.09	181	308	6057
0	13115.4	132299	-6448	49	311	5320
2.498	11961.7	114625	-3640	54	235	4905
3.023	5187.38	3336.77	-777.585	47	51	132
0	9668.71	21528	-3698	94	171	1160
3.579	18927.5	178766	-4790	70	403	6746
2.75	8575.2	16781	-2748.3	76	142	844
0	13731.9	88591.3	-6892.04	40	291	3799
2.309	3342.38	1306.6	-661.663	34	40	100
3.087	13203.9	119128	-3210	40	235	4905
3.028	4823	2904.45	-1197.3	34	71	249
0	16318	191669	-8499	230	358	7337
0	23871.7	316380	-13518	141	477	9693
2.965	24076.6	469701	-12600	39	483	15505
0	8745.29	27356	-4790	18	173	1524
4.03	6835.72	4042.8	-2213.27	75	101	249
2.936	4370.71	1889.72	-995.508	7	63	166
2.365	5378.94	4290.38	-532	11	79	317
0	35031.2	839199	-16112	533	713	24012
2.276	8557.56	16694.1	-2784.69	82	142	844
0	9945.75	31692	-5676	100	189	1687
4.416	14132.1	49640.3	-3120	48	234	2464
3.774	9767.52	10227.6	-2290.35	91	130	490
0	13088.3	38582	-4539	22	197	1519
4.75	8519.19	4677.3	-2555.47	27	131	271
1.95	11565.4	57992.2	-4366.97	126	217	2904
4.793	14707.9	80511.1	-7022.12	71	320	3466
4.016	9052.43	11077.3	-3101.81	25	156	654
3.998	10406.6	33142.6	-3308.47	72	176	1922
4.346	12402	90207.5	-4160	22	220	3450
4.011	9241.18	36781.6	-4370	35	196	1997
3.449	7589.93	9536.42	-2421.27	20	123	621
0	10727.5	60535	-4729	26	241	2744
0	14492.6	74877	-9693	58	349	3135
0	24161.7	363088	-13063	369	604	11142
3.2	15096	114304	-4730	69	271	4426
2.513	10123	10390.1	-1740	42	154	587
0	13227.2	85425	-7354	199	275	3711
0	9918.38	41130	-4655	24	148	1412
3.618	9614.2	25683.3	-3162.97	40	174	1415
3.451	7992.31	24754.7	-785	27	156	1364
3.911	7955.62	27162.8	-2858.31	87	156	1521
3.647	5061.66	3752.38	-2350	10	79	292
0	30890.7	890793	-16372	136	728	24027
3.714	18867.5	197979	-7660	55	390	7459
4.552	9739.95	35558.1	-4451.32	120	208	1691
2.826	12603.2	78304.5	-3790	47	272	3539
3.896	9099.99	16482.4	-4160.46	88	172	973
4.589	11977.3	91286.1	-6320	61	254	3885
4.713	10066.5	37230.3	-3460	41	196	1997
3.749	5389.69	2995.97	-1188.01	44	67	224
3.326	3367.58	1409.09	-660.443	33	40	100
3.382	12232.6	60188.3	-5470	24	247	2754
0	12663.4	79528	-6471	127	292	3546
4.085	7878.57	12922.1	-2643.82	15	132	806
2.744	11995.7	113176	-2330	41	235	4905
3.601	18552.8	160616	-9240	94	388	6290
0	16321.1	100742	-8039	62	328	3980
4.988	9757.49	30542	-3205.91	119	171	1747
3.455	7086.23	10422.7	-3070	23	109	689
3.391	14059.8	60700	-5320	27	247	2754
4.279	5552.93	10965.8	-1995.51	23	102	764
0	5654.66	5248	-2305	49	78	364
2.917	6432.89	12309.5	-1874.63	7	105	765
4.488	9989.04	36671.1	-2900	33	196	1997
2.5	11022.3	37999.9	-4313.44	118	205	1751
0	10342.2	40023	-6092	34	208	2054
3.598	8259.26	21169	-2864.42	80	145	1156
0	13974.6	205332	-10237	66	347	8206
4.25	18630.6	175573	-4810	72	403	6746
0	3897.95	1636	-1156	9	66	148
4.499	9408.29	30417.9	-3263.5	120	171	1747
0	13110.6	47322.9	-7632.78	50	298	2196
4.96	13429.1	53782.9	-511.224	84	209	2534
4.142	19876.1	251162	-14300	71	540	8870
4.374	8874.23	13856.5	-2935.83	21	148	729
2.832	16976.2	145422	-7440.93	187	362	5847
4.357	11155.1	52644.9	-3840	53	224	2192
0	10508.8	24043	-5652	59	140	1061
4.011	7659.06	9547.41	-2501.97	30	123	621
2.077	15178.7	115650	-4030	48	271	4426
2.713	13777.7	51552	-5110	41	234	2464
0	5082.03	1918	-1128	19	74	133
4.024	9103.17	29620.7	-2060	31	166	1414
0	11987.8	72940	-3892	17	303	3459
0	13023.9	95238	-6347	88	275	4429
0	11542	54205	-3909	38	190	2180
3.252	15665.7	115945	-4780	49	271	4426
3.841	7165	4040.21	-2268.54	70	101	249
2.843	24700.4	281528	-12600	70	540	8870
0	18501.4	389928	-13295	119	509	13968
0	12289.9	41736	-7535	18	190	1526
2.102	5040.09	4283.09	-1350	11	79	317
4.479	9644.63	25580.3	-2198.32	19	174	1415
4.657	5085.97	4330.18	-1293.45	15	72	340
4.577	9378.69	30368.4	-3296.86	121	171	1747
2.166	5062.13	4277.82	-2100	11	79	317
0	11429.2	40005	-5264	33	228	1933
0	13745.6	49955	-6365	42	260	2196
3.315	14741.9	59292	-5030	40	215	2188
2.231	8153.95	9274.64	-2796.31	32	138	554
3.885	8616.56	30151.6	-2036.64	26	132	1513
2.822	8135	12035.3	-2532.61	82	128	693
0	7838.21	18540	-3768	9	152	1069
2.194	25062.9	473976	-9470	38	483	15505
4.649	5659.09	1702.87	-1385.68	21	76	147
0	18218.5	260837	-10300	61	403	10236
3.681	13413.5	60616.4	-454	32	247	2754
3.153	13846.5	91755.4	-5920	62	254	3885
4.543	5454.59	4333.47	-2200	14	79	292
0	10773.3	24336	-4345	25	235	1071
4.159	22537.5	515348	-11594.6	149	540	18067
4.126	8196.01	12311.5	-2942.29	72	136	619
4.636	9561.38	30266	-3238.31	122	171	1747
2.782	11980.6	46667.6	-6790	18	215	2188
0	12369.5	60324	-7202	196	291	2825
3.744	9859.61	33654	-3551.78	79	176	1922
0	19437.2	236439	-11919	82	471	7842
4.339	13994.7	52524.6	-6074.9	47	288	2334
3.949	12456.8	78539.8	-3570	50	272	3539
1.39	5502.12	4355.45	-679	15	88	292
0	14261.2	68363	-1143	45	284	2901
2.963	6513.48	10299.4	-3180	14	109	689
4.731	18414	204909	-9700	69	390	7459
3.74	7590.31	15608.1	-2725.86	75	134	970
4.888	12031.5	71157.7	-5612.2	47	262	3211
2.476	15476.9	87432.8	-3100	54	223	2059
2.597	23883.2	471876	-12000	70	483	15505
3.901	9949.03	32710.2	-3525.18	94	176	1922
2.869	5840.35	7529.36	-1900.47	59	104	457
1.646	7826.51	9444.61	-3055.8	98	130	490
0	13749.4	59648	-5627	32	275	2753
0	13509.6	92110	-5886	30	294	4064
0	16094.5	153002	-10387	185	400	5535
4.495	10844	27717.4	-1510	25	194	1521
1.892	4857.42	3793.96	-1010	13	79	317
0	9498.21	20818	-3721	161	162	1255
4.728	9476.59	28967.3	-2520	41	166	1414
0	19302	267837	-11473	54	410	10529
4.561	9124.45	28716.8	-3439.81	39	179	1626
0	14971.3	93084	-7089	71	329	3808
0	10235.6	90593	-4532	17	222	4144
4.714	9768.55	38130.4	-3721.39	37	180	2054
3.898	8039.89	12862.3	-456.047	26	132	806
0	11877	48500	-4436	50	261	2328
3.604	9540.37	26527.4	-3636.76	25	174	1415
3.329	9749.23	26309.8	-3351.99	23	174	1415
2.304	22162.3	409583	-8120	61	473	14125
3.576	11091.6	39298.3	-3594.69	29	193	2118
3.631	13635.3	97387.4	-5997.13	168	281	4061
2.881	13112.5	52075.4	-5020	22	215	2188
0	5813.51	3441	-1621	7	95	269
0	8630.13	14074	-3700	103	153	771
1.575	4048.37	2229.47	-1022.6	32	54	165
3.003	15539.2	85623.6	-2510	55	223	2059
4.664	11948.1	70285.5	-5700.43	38	262	3211
0	12823	68073	-6167	104	292	2679
0	13010.7	111613	-9781	175	301	5018
3.095	9833.73	51810.7	-3210	26	188	2599
2.76	24016.4	280750	-11300	73	540	8870
2.254	5793.87	7660.14	-1863.96	75	104	457
3.133	11253.4	87103.4	-3160	17	220	3450
3.509	18163.7	159812	-10400	90	388	6290
2.432	8635.09	9618.1	-2554.01	97	130	490
4.167	5655.36	7135.8	-1767	50	93	545
4.384	9712.19	34426.9	-3090	26	166	1414
1.009	3494.67	1437.77	-1007.61	42	52	133
0	5945.33	1776.01	-1755.02	50	84	136
4.838	22439.7	282722	-9698.75	66	468	9276
4.044	22555.7	516177	-11510.9	144	540	18067
3.578	8993.53	21945.4	-2854.94	81	152	1165
0	21841.7	375981	-12748	71	507	13152
4.151	8815.98	27315	-1870	39	156	1364
4.66	9236.4	30433.3	-3412.36	127	171	1747
2.959	4771.49	3136.24	-1195.98	42	71	249
2.545	11659.4	33562.7	14100	23	234	1581
3.535	23256.2	282723	-15700	58	540	8870
3.45	5512.77	3371.57	-1076.47	38	71	249
4.571	13717.9	94747.9	-5667.16	48	294	4249
3.396	6798.08	13429.8	-1538.95	25	96	804
4.298	13755.2	47336	-5759.16	69	273	2061
2.7	22719.8	414043	-8280	63	473	14125
0	17227.4	277641	-8804	49	381	10238
2.719	6410	7458.94	-1624.6	49	93	545
4.245	5831.68	11119.3	-1912.54	31	102	764
4.698	12598.4	71637.2	-5533.16	54	262	3211
0	6191.28	8489.3	-1538.27	31	87	483
1.557	4167.36	2192.04	-1103.87	20	54	165
4.911	9901.28	24315.6	-1370	16	166	1111
2.5	5954.92	7555.29	-1612.32	49	93	545
3.168	13384.6	48029.1	-3300	51	223	2059
0	8214.82	31749	-4094	29	161	1868
0	11868.5	55331	-5446	37	218	2390
2.718	16728.4	162162	-7754.51	76	352	6744
0	21154.7	175130	-7443	53	410	5323
2.377	10369	10518.5	-2030	35	154	587
0	15160	91289	-7830	47	299	3714
0	4611.53	2769	-1106	3	59	166
2.778	11944.8	115635	-4640	53	235	4905
3.829	9398.21	26234.4	-3384.74	29	174	1415
0	6751.72	10607	-2710	18	96	580
1.465	5382.6	4320.41	-558	13	88	292
0	11852.3	59052	-7234	78	324	2759
3.661	13304	98176.2	-5748.09	154	281	4061
4.513	9399.52	37849.5	-3790.74	39	180	2054
0	14274.2	57692	-7205	82	258	2330
3.91	9544.8	27754.9	-2904.36	102	158	1403
2.787	11115.3	83593.5	-1020	25	220	3450
1.818	5587.06	4154.12	-1526.91	126	88	318
4.286	8104.63	4633.68	-2692.97	32	131	271
2.25	5771.52	4173.87	-1472.52	125	88	318
2.921	12173.5	113351	-4130	44	235	4905
4.906	9058.63	13430	-2950.43	18	148	729
3.519	18363.4	161065	-10000	99	388	6290
0	9773.13	30178.1	-3460.06	125	171	1747
1.627	4156.11	2158.09	-1068.44	20	54	165
0	10059.4	25711	-5363	88	146	1209
0	16263.7	140452	-8482	54	369	5536
0	11316.7	31063	-4898	55	209	1468
4.218	9798.71	34343.8	-4452.98	126	208	1691
0	16321.3	118728	-4140	79	331	4721
4.967	6358.75	5200.46	-892	14	85	343
0	8129.69	12485	-3637	30	142	767
4.764	13662.9	98430.3	-5828.66	174	281	4061
0	9969.04	37380	-3115	32	176	1696
3.294	11532.2	44871.4	-2130	34	166	1414
0	8891.96	8580	-3250	18	123	517
3.115	11539.6	114305	-3380	47	235	4905
0	16117	141951	-7254	39	331	5532
4.625	8997.19	28728.2	-3418.35	35	179	1626
4.295	13685.8	98380.3	-5494.96	144	281	4061
1.827	25404.8	472342	-9620	38	483	15505
3.409	22471.6	412086	-6620	60	473	14125
3.639	10427.2	26092.9	-4344.35	39	214	1469
2.805	12184.6	89290.7	-6700	46	254	3885
3.446	8598.82	26340.6	-2320	32	156	1364
4.637	19267.5	196483	-7870	48	390	7459
4.607	10433.5	28618.6	-2610	27	194	1521
2.332	6316.62	12958.2	-1622.58	15	96	804
2.886	13977	141247	-4180	48	315	5844
2.516	20699	248377	-11700	98	537	8350
2.722	15142	60470.1	-6498.04	147	305	2610
4.794	13007.2	44998.2	-5714.46	55	273	2061
0	8751.63	14889	-4903	15	160	769
2.802	14383.9	51081.9	-2460	40	234	2464
4.993	8696.1	10058.8	-1280	29	149	549
3.135	16370.9	173366	-7200	65	403	6746
2.487	15425.9	83662.8	-2240	55	223	2059
0	14445.9	124944	-11838	237	354	4919
3.734	18465.7	398873	-8370	81	473	14125
2.928	6167.71	10370.5	-3190	13	109	689
0	19057.6	366884	-14247	111	472	12970
3.671	16634.4	145365	-4280	53	315	5844
3.364	15730.1	110856	-5130	34	322	4619
0	14469.9	80813	-5728	186	241	3136
3.375	9658.82	10190.5	-2140	37	154	587
2.885	12462.5	60594.3	-5610	29	247	2754
4.133	9665.2	20892.6	-3307.91	77	163	1162
3.187	23779.2	262549	-14700	82	540	8870
4.476	9650.88	27466.9	-1870	27	166	1414
2.937	7767.28	12235	-1670.8	13	105	765
2.916	21749.2	410106	-9280	65	473	14125
2.112	3973.8	1447.52	-997.689	42	52	133
3.513	13993.3	90825.8	-4080	49	254	3885
3.857	12632.6	46391.7	-5865.83	62	273	2061
0	4237.13	2484	-719	19	77	186
3.664	7761.04	12579.3	-1686.98	14	105	765
0	9782.13	41885	-4572	27	213	1992
3.517	8520.2	27422.6	-2928.48	85	156	1521
4.245	5831.75	11119.2	-1918.67	31	102	764
1.63	5437.92	4262.17	-1320	14	88	292
4.875	15325.9	84615.2	-7010	45	272	3539
2.548	10697.1	49584.4	-4980	27	216	2677
1.812	13351.4	40263.2	-1730	41	234	1581
0	7093.75	12571	-3620	286	131	764
3.094	10591.3	25737.6	-1900	29	166	1111
0	6305.26	4342	-2608	17	100	270
4.131	23173.3	516224	-11555.7	138	540	18067
3.193	5055.19	3249.8	-1158.08	35	71	249
1.972	6329.23	7320.94	-1617.07	51	93	545
3.278	24128.5	279957	-13400	64	540	8870
2.919	7397.18	14879.8	-2771.1	78	134	970
2.675	4986.74	3178.44	-1128.08	38	71	249
2.64	8766.46	26176.9	-2050	25	156	1364
3.245	8353.16	9894.1	-2370.49	21	123	621
2.091	7221.03	9289.35	-3192.86	15	138	554
4.855	12452.9	71412.6	-5628.32	28	262	3211
2.612	5237.35	3157.56	-1085.28	38	71	249
4.407	11158.8	39647.6	-3980.49	101	205	1751
3.252	14329.4	58233.7	-5750	40	215	2188
3.957	13194.6	81092	-4230	54	272	3539
4.598	7558.99	7511.58	-1780	157	109	486
2.895	14539.1	141501	-5480	44	315	5844
0	23961.3	354096	-15114	116	561	11745
3.176	11062.5	85192.7	-2960	19	220	3450
4.538	9448.28	38130.8	-3808.5	41	180	2054
0	9017.84	20768	-3656	41	165	1024
1.842	5797.85	4268.28	-1552.03	122	88	318
0	23164.1	626764	-10352	115	484	9688
0	8072.84	30931	-3057	12	158	1580
4.509	8622.52	37689.6	-3932.59	53	180	2054
1.756	12075.6	36356	-2900	29	234	1581
0	13184.9	181069	-6692	40	277	7201
0	15180.4	122375	-8474	35	319	5119
4.603	11562.4	48079.4	-1410	27	166	1414
1.315	11536.9	68785	-5209.83	145	247	3373
2.714	8548.76	24902.6	-3248.58	29	157	1519
2.876	9492.75	39256.8	-2970	21	196	1885
0	11855.9	104601	-5846	34	262	4623
2.498	10280.7	42748.7	-1570	53	223	2059
2.595	9764.24	42738.6	-3052.6	97	159	2181
2.289	2751.72	63.3573	-455	6	33	5
3.764	7674	8013.07	-1030	20	111	453
4.237	5614.79	3414.74	-2430	20	86	205
0	5772.69	4598	-1821	109	85	342
2.181	15365	115567	-3860	54	271	4426
3.961	10336.5	37402.5	-3811.3	34	193	2118
0	22302.8	539834	-14014	86	582	17882
2.882	13799.6	90961.7	-4830	48	254	3885
0	7492.75	9478.59	-3142.1	94	130	490
2.936	14637.5	139653	-4240	42	315	5844
3.508	5245.38	4512.69	-644	9	79	317
3.848	7124.67	9278.52	-3136.08	15	138	554
3.278	10619	85260.6	-2660	22	220	3450
0	18705.1	267599	-10496	36	396	9400
0	14451.4	74148	-5885	42	291	3217
2.209	5820.1	7524.57	-1888.65	75	104	457
0	17068.8	178744	-9938	296	381	6978
4.474	8840.38	28729.4	-3420.37	33	179	1626
3.194	9906.96	10780.6	-2400	38	154	587
0	17228.7	230844	-8095	94	419	8352
0	8546.7	11175	-3806	62	171	620
3.286	13213.6	79811.6	-5450	58	272	3539
4.029	6919.3	4087.83	-2350.43	71	101	249
4.427	20322.7	249718	-10400	61	540	8870
3.742	8034.49	16553.2	-2825.42	79	142	844
0	8267.63	27280	-5304	122	159	1628
0	12225.9	52519.9	-7039.07	43	288	2334
0	12604.9	41364	-6067	42	280	1938
0	17573.4	268551	-10935	63	481	9959
2.185	6825.99	5346.56	-1790	8	79	292
4.358	9978.71	38242.1	-3560.61	41	180	2054
1.937	12055.1	34441.2	-1980	22	234	1581
4.395	20931.1	183794	-4590	73	403	6746
3.782	22429.2	406787	-8510	57	473	14125
4.429	9376.99	28721.3	-3381.25	33	179	1626
2.189	5461.83	4349.85	-1880	15	79	292
2.766	15798.2	115111	-5340	55	271	4426
0	8942.5	39996	-3736	37	181	2181
0	7314.27	9436	-2997	11	140	554
4.128	2408.51	50.0457	-567	92	33	5
3.663	5641.47	7183.05	-1674.76	52	93	545
3.363	16803.1	175455	-6740	82	403	6746
1.598	10756.5	69622.4	-5440.91	131	247	3373
0	23082.5	309652	-12776	91	482	9834
3.48	11321.1	85817.3	-3910	20	220	3450
3.511	9612.66	23616.5	-897	18	166	1111
2.937	21499.4	465709	-12700	80	483	15505
0	12260.4	39182	-4420	33	236	1813
0	18588.3	232299	-12288	95	437	7837
0	9333.64	25863	-5669	34	200	1468
2.907	12271.5	52969.3	-3290	104	224	2192
2.445	11764.8	74748.4	-4980	31	249	3630
3.095	8485.72	13431.2	-2838.9	11	148	729
2.252	21456.9	409991	-9310	56	473	14125
0	7355.22	11978	-2116	35	128	769
1.842	6425.64	13424.5	-1597.91	16	96	804
1.822	17718	163265	-7354.62	78	352	6744
4.079	12282.8	46748	-1450	47	223	2059
0	14333.8	235068	-6996	58	349	9396
0	27622.6	437696	-12120	34	376	6518
0	11265.7	60754	-5331	138	232	2602
1.953	12850.1	74233.4	-159	25	249	3630
4.472	9462.34	16404.4	-2979.67	81	172	973
0	10098.7	43197	-4534	46	190	2318
2.069	12854.2	115837	-1970	44	235	4905
3.975	5927.07	4325.65	-1183.91	18	72	340
3.976	16616.2	200678	-9370	42	390	7459
2.782	13118.1	90940.7	-4040	45	254	3885
0	11157.9	39520	-6475	56	214	1931
4.532	25518.3	479263	-11700	54	483	15505
0	12282	67246	-4383	63	249	2903
3.068	9596.96	52031.6	-3070	43	188	2599
2.499	7444.32	9535.62	-2467.9	13	123	621
0	13561	144015	-4957.24	40	248	5018
3.617	8396.6	12233.2	-2765.3	80	136	619
0	14941.2	86906	-7672	76	299	3801
0	11086	45950	-4715	28	206	2194
3.334	11751.8	52284.9	-4160	20	216	2677
2.731	13579.3	142646	-6213.24	167	308	6057
2.176	10544.3	38120.2	-4218.68	97	205	1751
1.206	6011.7	4775.39	-919	23	85	343
0	10241.5	34794	-4704	151	205	1637
4.78	7888.73	4883.07	-2551.8	25	131	271
2.063	3904.15	1452.75	-966.672	42	52	133
3.639	10235.5	38842.4	-4072.43	30	193	2118
0	26414.4	757543	-15116	90	629	18498
3.391	5097.85	1646.18	-755.785	37	52	133
0	5004.54	1073	-937	14	66	87
4.386	12692.9	54873.3	-2760	58	224	2192
2.839	25132.5	470341	-13200	45	483	15505
4.969	3430.09	1969.8	-616.39	7	43	161
4.567	14003.6	47926.5	-5715.97	76	273	2061
0	8649.42	21504	-3789	18	154	1201
4.419	7610.95	9130.35	-1020	22	102	516
3.058	15150.5	60381.5	-5080	34	215	2188
3.549	20159.3	197060	-4780	81	403	6746
0	13652	165927	-7525	76	321	7208
3.927	8750.62	11283.2	-3195.81	46	156	654
3.667	9450.85	25682.7	-3380.14	36	174	1415
4.755	11716.8	61673.8	-4446.68	127	237	2672
1.377	5927.07	5113.75	-1470	24	85	343
0	18165.5	204814	-8886	24	374	7459
3.98	8733.32	13336.5	-2469.27	17	132	806
3.485	13781.5	50910.6	-3340	40	234	2464
4.918	9515.33	30625.6	-3239.88	120	171	1747
4.737	9006.17	37489.1	-3703.48	49	180	2054
2.384	10142.7	10457.2	-2180	36	154	587
0	9928.82	49921	-3879	30	216	2601
1.934	6679.29	13292.9	-1564.25	16	96	804
0	3691.12	1410.5	-1066.76	39	52	133
2.641	8618.63	25035.6	-3166.78	32	157	1519
4.367	25758.1	277467	-10900	68	540	8870
3.559	17010.5	111172	-5440	42	322	4619
4.626	8949.81	28996.3	-3378.1	35	179	1626
0	9404.98	25456	-3827	32	223	1317
3.41	7288.54	14178.6	-2340.81	88	120	809
1.004	2518.96	51.3272	-523	6	33	5
0	12224	62391	-6441	26	238	2679
2.802	6155.14	10204.3	-4030	26	109	689
4.122	22021.4	516401	-11620.2	147	540	18067
2.483	8292.89	11997.5	-2546.58	82	128	693
0	9015.47	27283	-3705	392	176	1571
0	15553.3	145531	-8265	45	345	5640
2.882	8528.63	21168.9	-306	31	166	1111
0	4746.93	2021	-1375	8	60	148
4.644	9626.08	52132.7	-2760	53	188	2599
3.31	14406.8	143278	-6069.13	166	308	6057
3.2	10594.9	85411.9	-2490	22	220	3450
0	15785.5	123102	-8574	100	317	4724
1.831	2435.41	60.9691	-469	96	33	5
3.626	8851.88	17191	-2678.59	81	142	844
2.525	10694.2	37905.5	-4176.08	128	205	1751
0	16374.5	214421	-11567	154	390	8347
0	29586.5	849315	-14655	70	568	18272
0	6008.03	4506	-2124	14	101	317
4.961	6885.9	8702.4	-1902.74	64	107	517
3.758	11047.1	39556.8	-3866.13	28	193	2118
2.726	11552.7	47425	-6570	33	215	2188
0	15824.7	190186	-6763	34	310	6508
2.316	15368.4	117269	-5580	54	271	4426
3.192	9584.34	27657.9	-2932.47	100	158	1403
3.13	8174.08	9778.28	-3143.55	30	138	554
1.81	12689.4	37164.5	2030	42	234	1581
3.864	7061.03	4059.86	-2290.12	69	101	249
0	12005.7	74442	-5532	28	252	3455
0	11459.4	49001	-5152	59	228	2329
3.975	12887.9	46893.8	-5947.8	67	273	2061
4.856	12666	71613.4	-5664.73	29	262	3211
0	10858.2	41126	-5569	26	189	1994
4.795	8335.84	10317.9	-2298.04	22	123	621
2.917	10812	38484.3	-3776.67	25	193	2118
4.43	9230.25	28713.3	-3397.78	35	179	1626
2.854	6399.87	10268	-3500	16	109	689
3.45	13403.6	60862.4	1630	42	247	2754
4.328	7663.9	10157.7	-2457.06	22	123	621
4.903	5249.25	2092.77	-1619.92	4	82	185
0	12324.9	94102	-5956	50	261	4155
2.116	5328.99	3456.15	-722.181	31	51	132
2.959	6704.25	5176.73	-2108.01	59	107	346
4.216	12973.4	46644.8	-5852.49	67	273	2061
0	7114.44	14646	-3758	17	126	806
0	12370.2	44187	-6851	49	279	2003
3.118	14272.7	57841	-5890	24	215	2188
3.732	11546.3	50352.7	-3530	49	224	2192
3.176	9808.29	26360.6	-3394.16	42	174	1415
1.45	12219.2	73464.1	-4580	23	249	3630
4.302	10155	34791.1	-3000	31	166	1414
2.672	7868.57	12102.3	-2511.61	82	128	693
3.976	9204.06	11374.4	-3088.99	38	156	654
2.678	8847.18	25385.8	-3122.92	34	157	1519
3.521	10688.6	57904.3	-4439.24	144	217	2904
0	12448.2	101793	-7019	116	275	4148
2.639	8272.61	25181	-3179.72	27	157	1519
1.694	16626.3	163826	-7555.21	71	352	6744
4.385	13300.6	52218.2	-6156.94	52	288	2334
2.197	3842.3	1454.43	-925.579	35	52	133
4.595	9090.65	37602.5	-3840.27	39	180	2054
0	7391.06	14376	-3306	20	152	892
0	11496.8	22004	-5297	116	204	1070
0	15614.5	178927	-8576	60	345	7214
0	11708.8	60976	-6453	25	255	2828
0	15909.9	199853	-7748	296	346	8209
0	17399.2	121556	-5244	149	341	4441
3.281	6898.14	13925.3	-2382.49	98	120	809
0	8414.01	8012	-2649	34	133	487
0	9331.68	23777	-2810	31	146	1258
3.658	12774.3	96912.5	-3440	33	220	3450
3.296	9024.41	26081.7	-2810	28	156	1364
2.772	4317.33	1939.15	-1058.31	5	63	166
4.851	14944.7	117075	-6370	70	271	4426
2.834	6511.93	10239.5	-3090	16	109	689
0	5266.77	2930	-2285	13	75	187
0	9871.51	27749	-3675	64	193	1632
0	27671	443927	-16710	128	693	13324
1.942	8679.08	20154.6	-3500.78	79	163	1162
0	6457.93	11533	-2168	59	108	765
2.227	5740.49	7546.56	-1877.2	77	104	457
2.1	5107.6	3170.73	-1149.19	45	71	249
2.043	15022	59410.4	-6303.99	159	305	2610
2.994	8719.41	38774.4	-3560	21	196	1885
4.665	5643.11	4270.93	-1242.66	11	72	340
3.03	21861.3	258583	-6200	56	540	8870
4.582	8208.14	22128.7	-2943.31	82	145	1156
3.428	7296.97	15438.8	-2654.05	66	134	970
3.726	10306.2	51748.9	-3620	22	188	2599
2.521	9364.71	24106.3	-496	12	166	1111
0	14563.3	91283	-7959	74	291	3888
3.815	12898.6	54649.2	-4150	32	216	2677
3.462	17774.6	195370	-4210	50	390	7459
3.41	18617.9	160264	-9060	91	388	6290
3.403	4934.45	3938.09	-1070	22	88	292
0	9853.85	75543	-4755	27	227	3794
2.385	5922.5	5013.78	-2010	6	79	292
4.409	9978.85	22245.8	-1760	25	182	1212
2.433	11387.2	113467	-3630	47	235	4905
0	15524	213920	-7010.88	42	336	8195
2.511	9641.92	10177.2	-2400	36	154	587
3.416	8897.53	13864.5	-2880.43	19	148	729
0	10777.1	25677	-4613	27	185	1116
4.007	10108.6	26247.4	-3302.05	26	174	1415
2.808	7459.32	9274.98	-3105.44	25	138	554
0	4965.16	2133	-1449	2	63	146
3.856	6189.59	7174.03	-1615.69	52	93	545
2.819	8407.51	12154.8	-2652.28	83	136	619
3.807	10077.9	34028.9	-3413.54	71	176	1922
0	10746.7	43935	-4229	107	213	2190
3.936	4957.67	1536.49	-1530.79	19	76	147
0	10247.7	16793	-3006	21	138	555
2.01	13594.2	138535	-5580	44	315	5844
1.957	11976.5	114418	-2870	35	235	4905
2.901	6855.47	5092.29	-2254.51	71	107	346
4.391	8861.77	27344.7	-2460	28	156	1364
2.853	11973	113826	-2690	60	235	4905
1.276	5229.74	4255.3	-1280	14	88	292
2.669	22535.5	246855	-9500	102	537	8350
0	18894.7	119846	-9619	34	360	4434
4.443	8176.31	12161.9	-2446.82	77	128	693
0	9642.8	45915	-4686	63	229	2254
0	8651.28	36885	-5031	14	166	1806
4.732	5608.52	10681.1	-1990.35	34	102	764
2.338	7276.86	9229.25	-3080.58	19	138	554
2.7	12198	45319.4	-2670	43	223	2059
1.568	7084.57	5425.36	-1990	16	79	292
0	13158.6	39255	-5186	50	273	1695
2.472	14769.1	80786.9	-158	68	223	2059
3.143	24076.4	477532	-11300	46	483	15505
0	14489.9	91054	-6164	62	293	3887
0	10616.5	62176	-5485	27	265	2905
1.565	7387.28	5728.99	-1560	21	79	292
4.355	9305.3	37445.8	-3791.2	44	180	2054
3.857	7731.19	12852.4	-2817.36	15	132	806
2.904	4668.37	3254.26	-1223	33	71	249
1.914	10712.2	57876	-4515.76	140	217	2904
0	6943.55	17346	-1834	31	136	1022
1.466	12167.9	73491.5	-4200	25	249	3630
0	15097.8	188347	-5336	58	323	7333
0	8794.65	29344	-3825	90	162	1576
0	7468.17	16231	-4132	26	148	1019
3.078	5914.45	7385.73	-1624.35	49	93	545
4.174	9965.16	38797.7	-3676.14	37	180	2054
0	10932.6	41785.9	-5541.69	120	227	2059
2.955	5265.26	3469.44	-802.551	49	51	132
0	19749.5	233475	-10600	45	442	8206
3.996	7359.17	4126.9	-2288.53	69	101	249
2.284	4965.28	4261.85	-1450	10	79	317
0	5155.67	3779	-1592	4	77	245
3.504	12420.7	52500.3	-6410	55	234	2464
3.601	8267.86	12429.5	-2443.19	39	136	619
0	23580.4	292421	-12268	340	515	8866
3.951	24732.2	478163	-11300	44	483	15505
0	14546.5	89155	-5977	49	267	3540
3.182	9605.63	31324.5	-3471.3	74	176	1922
4.487	5686.88	3728.32	-765.622	24	51	132
0	9299.56	26920.8	-3715.18	37	174	1415
2.58	15547.9	81817.3	-2870	53	223	2059
1.537	7927.66	9439.2	-2963.01	98	130	490
0	13501.5	128536	-7136	53	308	5421
4.4	9087.96	28495.3	-3478.53	32	179	1626
3.048	9428.32	52231.5	-3150	39	188	2599
1.289	11468.3	68943.4	-5165.95	146	247	3373
4.665	9758.86	36201.5	-3730	44	196	1997
4.694	13451.4	52729	-6067.11	60	288	2334
2.786	11960.4	60062.4	-6110	36	247	2754
4.019	5853.68	11139.7	-1878.67	20	102	764
4.428	8066.26	27280.7	-2907.63	86	156	1521
1.265	5373.24	4253.85	-1060	14	88	292
3.16	8940.25	27458.3	-1990	39	156	1364
1.56	7128.64	5616.03	-1660	16	79	292
2.2	8241.25	9424.94	-2889.24	23	138	554
2.74	9514.69	39271.5	-2720	26	196	1885
2.028	5236.06	4283.91	-1310	11	79	317
4.183	9819.82	34410.8	-4515.51	130	208	1691
3.914	14431.5	102008	-5610.24	151	281	4061
3.27	11544.4	114234	-2220	47	235	4905
4.707	9521.98	21965.5	-2771.98	67	145	1156
4.335	16683.3	110838	-5270	34	322	4619
2.115	2427.73	63.4633	-407	96	33	5
4.415	11479.2	39936.2	-3729.77	35	193	2118
0	12901	39537	-5705	54	253	1875
0	14784.6	145551	-8616	193	359	6078
3.375	13450.6	46095.6	-5504.43	47	273	2061
0	17750.4	113290	-9224	114	329	3978
2.629	5981.13	10323.9	-3240	20	109	689
0	9829.02	38973	-5079	22	197	2051
2.338	9495.15	10095.3	-2630	42	154	587
2.348	9343.37	10120.2	4320	36	154	587
4.544	6058.42	7612.08	-1763.44	77	104	457
4.369	23562.8	259844	-6170	104	537	8350
2.191	5917.43	7567.57	-1843.06	75	104	457
4.088	21877.9	516194	-11570.9	143	540	18067
0	8309.51	22656	-4459	47	163	1207
4.604	5492.68	3766.63	-808.519	44	51	132
1.867	3622.05	1446.96	-1027.19	42	52	133
2.731	13254.3	49027	-2730	47	223	2059
0	14846.9	183809	-9681	258	404	6978
4.771	9411.86	30492.3	-3333.34	123	171	1747
1.787	11269.7	35792.5	-4770	27	234	1581
1.475	3933.4	2175.72	-1056.32	20	54	165
4.768	14532.9	146238	-5130	60	315	5844
4.581	10629.9	35489.8	-4235.18	94	208	1691
4.34	11670.5	30398.9	-1910	29	194	1521
3.002	19907.4	244713	-11300	84	540	8870
0	16649	180424	-10480	50	356	6857
0	19805.1	315037	-11862	155	414	10385
3.468	9168.29	26566.5	-2540	24	156	1364
2.152	7344.4	4829.14	-2700	14	86	205
1.938	8182.23	9520.19	-3018.13	98	130	490
4.805	9232.11	11184.6	-2689.79	84	139	587
3.381	13829.2	50289.4	-3370	39	234	2464
1.991	4625.93	4226.39	-1940	12	79	317
0	7702.14	9623	-2960	16	149	585
4.653	6726.57	6523.08	-2100	13	119	395
0	7128.39	10705	-2053	29	113	653
3.004	24170	270648	-10000	103	537	8350
1.913	10195	37853.8	-4191.1	133	205	1751
0	23694.8	544513	-12586	161	597	14153
2.88	6290.16	10368.1	-3160	13	109	689
0	5165.53	6943	-1092	9	86	456
2.17	4957.5	4271.69	-1630	13	79	317
2.917	4139.33	1961.18	-1102.76	5	63	166
2.135	5525.33	4417.01	-941	17	88	292
4.805	3727.97	2226.62	-567.707	3	43	161
4.561	19305.5	201891	-8790	57	390	7459
4.711	11941.7	30389.7	-2460	40	194	1521
3.299	18966.7	181433	-4810	88	403	6746
3.397	12992.2	103745	-2810	14	220	3450
3.456	6934.04	14098.9	-2450.85	80	120	809
4.217	9039.12	13588.2	-2887.48	18	148	729
1.762	12244.8	73576.6	-3520	20	249	3630
4.551	3570.21	2052.5	-584.989	9	43	161
4.196	5726.46	11450	-1933.85	24	102	764
0	8073.26	31541	-5869	22	169	1690
4.01	11106.4	27847	-3818.59	67	214	1469
3.201	9687.52	36875.2	-4146.96	110	205	1751
4.879	8425.71	27294.6	-2968.33	83	156	1521
4.195	10217.5	34850.3	-4342.15	125	208	1691
0	14119.4	120748	-8282	26	304	4917
1.28	11294.5	68802.1	-5243.05	147	247	3373
3.578	10073.4	38197	-4051.75	21	193	2118
4.929	11301.3	51695.7	-4344.86	114	209	2534
0	7953.51	16424	-4273	59	126	726
4.461	13557.6	51832.7	-6007.91	59	288	2334
0	17630.5	164419	-7752	57	344	5849
2.566	6899.13	5007.76	-2219.53	73	107	346
4.491	10152.6	35810.3	-4297.08	110	208	1691
1.971	5818.75	4152.67	-1500.11	116	88	318
1.874	12110.9	73626.2	-3970	28	249	3630
3.442	18578.3	160238	-9820	88	388	6290
0	23900.7	471266	-12026	124	641	14152
4.99	13868.8	52037	-5911.85	56	288	2334
1.189	4884.58	4250.86	-1320	16	88	292
3.398	11821.7	31393.6	-108	31	166	1111
3.141	19835.2	410295	-10300	65	473	14125
3.178	13268.3	78977.5	-6020	57	272	3539
4.785	11121.3	28692.9	-2130	32	194	1521
0	7188.02	9908	-2307	19	120	486
3.051	7033.43	5224.05	-2167.95	60	107	346
4.534	20672.4	344682	-7770	93	462	11563
3.206	10361.2	28895.6	-1080	18	166	1414
1.763	5160.6	3402.5	-803.096	47	51	132
4.068	13021.2	41398.1	-2200	45	234	1581
4.984	4270.01	1390.93	-910.956	27	51	102
2.991	9280.87	17391.2	-3999.89	80	172	973
2.345	5963.25	7619.87	-1770.49	68	104	457
0	11843.2	127748	-5542	117	257	5517
0	5373.48	2729.62	-1759.8	49	83	187
0	19507.1	284377	-10113	61	463	10829
3.336	10067.3	86561.7	-5940	50	254	3885
3.365	12162.2	50124.6	-4180	55	215	2188
3.996	12776.4	57548.5	-2650	45	223	2822
3.212	8544.9	12439.7	-2885.69	57	136	619
4.161	5829.34	11123.6	-1842.1	17	102	764
3.4	13678.4	60300.4	-3800	35	247	2754
4.003	5646.04	11155.2	-1916.24	17	102	764
0	12461.1	31024	-3150	51	216	1525
2.973	6804.93	10373.7	-2750	15	109	689
4.713	9501.9	37913.1	-3709.85	50	180	2054
3.52	11552.4	88232.9	-3110	29	220	3450
1.912	11757.1	70862.4	-4947.6	130	247	3373
0	27380.3	742906	-18695	74	628	22089
0	12755.9	90037	-6933	170	288	4066
1.696	8211.64	9436.65	-2889.15	93	130	490
1.141	5683.57	4800.58	-1350	21	85	343
1.643	5440.95	4244.9	-1260	19	88	292
3.346	10502.6	85728.9	-2670	19	220	3450
3.048	10208.2	40015.9	-3060	15	196	1885
3.081	9571.84	16947.5	-3910.36	85	172	973
0	7446.86	9442	-2257	43	123	487
2.11	11134.2	73675.8	-5690	21	249	3630
1.901	6597.9	7382.78	-1489.92	24	93	545
2.932	6864.31	5260.81	-2172.33	55	107	346
2.963	9079.69	39046.1	-2790	16	196	1885
2.529	12920.8	79748.6	-7030	46	272	3539
0	11007.1	79305	-3456	33	227	3704
3.581	12627.8	46045.9	-5891.05	71	273	2061
2.437	16289	117560	-3790	60	271	4426
3.734	5078.49	2849.35	-1226.36	45	67	224
0	28170.2	548951	-14501	173	613	15012
4.526	9435.8	38044.7	-3802.43	38	180	2054
2.924	9524.91	51460.2	-2730	31	188	2599
4.027	7802.18	12983.4	-2768.24	15	132	806
1.573	7152.74	5399.23	-1400	17	79	292
1.202	5743.27	4793.2	-968	22	85	343
3.297	18269.3	161541	-8280	72	388	6290
4.736	5773.28	1783.92	-1416.54	11	76	147
1.215	4977.12	4338.83	-1690	23	85	343
0	10579.4	83405	-5987	21	207	3708
1.239	5691.02	4328.39	-1170	14	88	292
1.62	4898.42	4069	-1520	12	79	317
0	12040.1	110734	-5400	40	257	4523
3.208	4002.39	1395	-931.193	38	52	133
4.408	12077.1	61731.5	-3929.65	117	217	2904
0	18058	186285	-6082	45	345	5963
4.605	4276.13	4044.92	-1434.02	11	72	340
3.916	8923.46	12103.7	-2713.73	93	136	619
0	17391	145770	-9618	212	330	5852
4.505	7528.93	13514.7	-483	52	121	808
4.147	9592.67	25927.6	-3330.62	23	174	1415
0	14301.4	116919	-6853	149	309	5013
0	8543.42	13828	-3979	36	146	807
0	9063.59	13733	-4577	30	171	764
3.846	7750.32	12820.7	-2734.45	15	132	806
0	6929.55	6514	-2869	19	112	424
4.769	7522.76	6917.85	-2147.87	32	108	428
2.307	4570.84	2780.94	-1391.63	54	67	224
0	6066.6	6393	-2099	17	108	424
4.869	10758.9	28734.5	-2230	36	194	1521
3.267	13252.4	75361.1	-4730	43	264	3217
1.913	12504.4	73435.8	-5130	28	249	3630
3.671	3596.39	1413.68	-1061.21	33	52	133
3.344	25084.4	280166	-10700	109	537	8350
0	13732.2	180892	-8642	302	368	7097
0	5639.86	1869	-2169	7	68	89
0	7576.15	26298	-5131	10	127	1355
0	4222.68	1358	-1940	4	63	117
0	4819.61	1154	-961	15	62	88
0.975	2643.5	50.7956	-571	6	33	5
0	8438	26292	-1957	17	159	1573
3.065	11730.5	112332	1670	43	235	4905
2.556	15403.6	116594	-4570	51	271	4426
4.286	9558.24	20458.5	-3296.78	90	163	1162
3.573	9515.05	25774.2	-3361.88	35	174	1415
4.658	8002.14	27171.9	-2889.25	88	156	1521
4.738	8739.61	28884.6	-3427.86	34	179	1626
3.529	12385.9	40858.1	-2850	38	234	1581
2.324	13415.9	42299	-2690	42	234	1581
2.861	5224.15	2842.69	-1169.14	48	67	224
0	7669.19	15376	-3014	14	134	933
2.132	11777.9	70867.3	-4838.65	109	247	3373
2.636	22801.9	240508	-10800	86	537	8350
2.904	11886.5	47536.2	-5210	23	215	2188
3.197	12732.1	60029.4	-4780	24	247	2754
4.769	9589.16	30103.7	-3260.76	121	171	1747
0	21151.2	344638	-10612	100	480	12026
0	7924.6	8026	-2107	25	127	373
0	9427.02	37741	-3161	22	184	2119
3.992	2441.18	49.7854	-441	92	33	5
1.935	5896.23	4175.54	-1540.61	122	88	318
3.601	7642.97	15478.1	-2794.54	77	134	970
3.486	11572.6	34213.6	-1800	41	166	1414
2.667	6503.85	10226.4	-1840	28	109	689
3.884	8636.19	11214	-3099.43	37	156	654
1.764	5044.16	4279.41	-935	21	88	292
4.494	9105.05	11710.6	-3201.09	40	156	654
3.745	10700	51211.5	-4538.91	119	209	2534
0	12825.8	29651	-7068	16	260	1416
3.585	19304	161519	-10000	91	388	6290
2.54	13159.6	90520.9	-5460	47	254	3885
0	13598.6	45565	-6352	54	263	2060
2.563	10256.1	10216.2	-2180	37	154	587
3.858	7932.09	12852.8	-2686.14	15	132	806
0	16263	95259	-5671	159	299	3628
3.08	22116.6	414233	-7450	68	473	14125
0	7084.18	16105	-3843	23	133	1058
3.859	9099.3	11610.2	-3012.64	30	156	654
4.393	5795	4549.72	-1197.51	22	72	340
1.806	12466.1	38232.7	6930	24	234	1581
3.939	8043.75	9651.8	-2839.08	41	138	554
3.373	10942.6	38814.9	-2850	41	196	1997
4.424	8366.61	22109	-2874.81	63	145	1156
1.402	6208.78	4926.94	-793	21	85	343
0	9341.85	22297.7	-4038.71	27	176	1313
0	4855.19	1081	-1155	21	50	72
4.35	9098.07	26794.5	-2943.2	99	158	1403
2.36	6447.48	11900.6	-1805.48	8	105	765
3.761	8724.29	11014	-3164.21	35	156	654
4.377	9099.5	20529	-2884.53	66	145	1156
2.306	19193.9	160620	-6341.91	141	352	6744
0	14107.1	79695	-6825	252	310	3464
4.829	9121.13	16743.2	-1664.08	0	142	844
3.083	11209.4	86899.5	-2510	12	220	3450
4.735	7486.25	14497.6	-2276.45	84	120	809
0	13557.7	155807	-5761	52	299	6966
0	9421.45	29264	-5887	79	169	1310
0	9142.47	12258	-3883	5	152	618
4.37	3624.09	1396.73	-591.311	23	40	100
0	8958.09	35419	-3358	45	195	1929
2.374	7116.62	9408.3	-3216.58	19	138	554
3.814	12396.4	63430.3	-3940	30	223	2822
0	7296.03	11115	-1501	28	104	454
4.951	7346.15	7311.09	-1000	157	109	486
4.604	9442.92	27087.6	-1640	19	166	1414
0	7723.89	10650	-2493	31	137	555
2.431	10443.8	37776.8	-4162	128	205	1751
3.645	8318.34	9303.39	-2807.07	22	138	554
0	13789.8	51294	-4580	49	260	2198
3.579	10074.1	51315.7	-2920	28	188	2599
3.184	14450.1	141377	-6088.35	173	308	6057
4.545	9378.16	37976.4	-3799.92	38	180	2054
2.763	6056.01	7401.87	-1576.64	51	93	545
2.887	7720.79	9479.92	-2451.65	15	123	621
0	8826.31	15087	-4600	35	157	889
2.376	8632.54	10519.2	-2883.01	96	139	587
0	18097.1	447557	-11461	67	456	15861
0	13493.6	54449	-5902	35	248	2398
1.686	11336.2	35581.1	-10.6	42	234	1581
3.751	5057.08	3930.71	-1267.04	8	72	340
2.282	13181.6	51268.2	-3420	41	234	2464
4.812	8662.79	4666.57	-2594.47	33	131	271
3.305	7473.14	14095	-2354.46	96	120	809
2.409	6935.58	9992.07	-3010	54	105	649
0	14194.9	73977	-5182	36	299	3379
0	9408.54	9499	-2491	25	103	344
2.127	10342.9	71981.5	-4550	25	249	3630
0	7816.61	21418.4	-2789.92	82	139	1108
2.994	10053.6	10538.6	-2130	36	154	587
1.91	3832.07	1448.62	-969.618	37	52	133
1.868	3810.25	2199.02	-1123.68	19	54	165
3.868	7938.3	12840.7	-2739.81	15	132	806
0	6082.44	9156	-3039	17	100	651
2.654	14577.1	141362	-4730	43	315	5844
2.923	6501.55	10321.3	-3480	15	109	689
0	7424.84	13150	-3447	14	131	807
1.616	5618.37	4257.58	-835	14	88	292
0	9325.69	31956	-3774	36	193	1643
0	17418.4	136908	-7619	78	351	5325
2.278	16361.5	160109	-7623.56	73	352	6744
3.077	9278.6	39095.3	-2190	16	196	1885
4.76	11238.7	24231.9	-3530	34	182	1212
0	7541.56	13859	-3866	13	141	928
3.585	7737.54	27383.8	-2886.97	91	156	1521
0	8095.8	9323	-899	27	135	556
3.236	21958.2	183308	-4570	84	403	6746
0	13901.7	146542	-8242	50	326	5954
1.287	11365.1	68787.9	-5227.6	147	247	3373
0	8210.23	17627	-3871	167	135	888
0	13968.3	95197	-5120	43	294	4063
0	17520.5	163450	-6937	89	368	5963
0.96	5704.48	4818.5	-1340	23	85	343
0	19405	191253	-10477	70	430	6866
3.799	11326.5	36370.7	-401	37	166	1111
2.445	9869.24	24602.2	-370	15	166	1111
2.628	8401.29	26143.6	-3130	25	156	1364
0	17511.5	156749	-8049	38	364	5018
4.341	8827.49	16902.6	-4028.75	67	172	973
3.825	18631.2	161589	-10900	85	388	6290
0	15358.8	136881	-6509	52	329	4725
3.348	13155.6	60788.8	-5720	27	247	2754
0	9980.23	38245	-5814	122	200	1753
4.82	7706.02	9022.32	-1670	22	102	516
4.253	20638.9	201487	-6570	49	390	7459
0	10285.8	19381	-3283	74	124	622
4.768	8991.83	38051.3	-3708.59	43	180	2054
3.371	7165.34	14822.2	-2525.86	51	134	970
0	5479.96	6157	-2741	6	97	395
2.419	11144	50141.1	-5100	25	216	2677
4.496	8335.12	11047.6	-3111.05	33	156	654
0	5510.91	2945	-2456	18	80	226
0	4834.25	1458	-1637	6	78	102
0	8577.57	16383	-2204	24	154	891
1.184	5855.3	4718.89	-1290	23	85	343
2.721	14018.7	140903	-3840	53	315	5844
4.992	9121.12	16306.5	-3207.34	85	172	973
3.757	18248.9	198621	-7200	51	390	7459
3.367	12319.5	78852.1	-6580	59	272	3539
0	8939.38	21043	-3563	40	149	1019
3.882	14488	97298.6	-5670.54	50	294	4249
1.412	4087.01	2227.55	-1120.23	20	54	165
0	26583.3	309356	-15417	114	585	9559
3.054	11902.1	46875.7	-5510	23	215	2188
3.177	10101.6	37727.2	-3769.87	40	193	2118
4.136	11380.6	41347.3	-2130	40	166	1414
2.711	12705	60222.6	-6240	23	247	2754
0	12232	100285	-6058	48	278	4429
0	19868.9	164865	-8930	58	400	5025
2.066	6476.38	13118.7	-1611.58	29	96	804
3.582	15204.6	141883	-5090	72	315	5844
2.058	20959	176374	-9300	98	449	5537
4.536	12183.8	71543.9	-5161.34	55	262	3211
0	7929.26	8568	-2136	66	154	553
3.2	10954.1	85561.1	-3270	21	220	3450
4.153	3925.72	2797.49	-1414.3	32	67	224
0	9180.52	39240	-3490	48	183	2054
0	7297.55	14181	-3814	8	131	804
2.823	6374.94	7457.23	-1450.34	48	93	545
0	17447.6	113186	-12061	106	440	4637
3.67	11014.8	24391.3	-336	28	166	1111
1.593	4037.77	2194.64	-1080.14	20	54	165
1.566	4085.38	2169.89	-1068.1	20	54	165
0	8933.56	31793	-2937	39	173	1868
2.462	15797.3	162964	-7738.85	89	352	6744
0	12574.7	57889	-5598	166	262	2326
2.816	8276.14	25338.7	-3191.52	35	157	1519
3.257	10900.6	85442.4	-1470	18	220	3450
2.54	13044.9	90516.9	-5390	49	254	3885
2.556	8176.37	10494.7	-3035.92	89	139	587
0	11827	69474	-4997	39	237	3127
4.161	15121.4	61674.1	-6710.24	154	305	2610
0	9432.26	25734	-4786	24	165	1411
4.22	9070.02	20594.1	-3429.72	94	163	1162
3.306	7499.46	14128.6	-2337.68	96	120	809
2.206	7739.17	9287.59	-3058.46	16	138	554
4.018	6892.63	4089.94	-2351.07	71	101	249
2.005	5192.89	4264.28	-1320	10	79	317
3.991	9363.17	13639.6	-2868.08	10	148	729
0	9134.73	18311	-4736	29	170	1026
2.604	7995.56	9363.47	-3065.99	18	138	554
0	7153.89	12360.1	-3192.38	80	130	694
1.806	12399.1	73888.6	-4310	19	249	3630
4.421	1954.23	55.5372	-368	97	33	5
0	17450	120164	-7539	66	347	4535
0	12024.5	19634	-3361	86	167	973
4.008	13413	46643.3	-5735.43	65	273	2061
1.843	5325.98	3491.26	-809.996	50	51	132
3.875	9791.21	26618	-3345.02	32	174	1415
3.173	6850.05	13320.5	-1528.1	22	96	804
0	9861.15	55495	-5279	170	212	2674
3.519	12641.8	60984.1	-4340	43	247	2754
3.183	9915.8	49426.1	-6660	22	216	2677
2.309	4611.41	2948.82	-1167.26	25	71	249
0	5388.83	3355	-1810	18	83	270
2.8	13345.7	51247.7	-3590	44	234	2464
1.266	11126.4	68859.3	-5165.71	145	247	3373
3.471	13181.2	46619.4	-5908.06	68	273	2061
4.572	14610.9	95162.3	-5509.27	46	294	4249
1.972	5304.84	3020.68	-1198.93	51	67	224
3.994	7126.8	4070.98	-2265.05	70	101	249
0	7481.51	4842	-3041	135	103	267
0	7853.09	7527	-2901	28	124	371
2.292	8889.54	27174.2	-2400	32	156	1364
4.998	5547.39	7039.64	-1719.52	48	93	545
3.556	10702.7	38074.9	-3744.36	36	193	2118
0	19508.6	334969	-11189	279	495	11582
3.994	10243.2	34611.9	-867	31	166	1111
3.287	11209.2	85910.7	-3660	18	220	3450
3.321	2598.31	52.1738	190	92	33	5
0	8878.09	27349	-5099	96	172	1629
2.123	5268.54	4271.53	-1370	8	79	317
0	4270.42	1867	-2205	37	62	163
3.548	13732.2	143402	-6205.81	161	308	6057
3.45	18760.5	160730	-7020	64	388	6290
0	8056.15	10228	-4708	277	142	620
1.556	13203.7	69333.2	-4348.41	108	247	3373
3.449	5176.78	4223.71	-1470	16	79	317
4.35	9457.39	13628.1	-2831.63	18	148	729
4.754	13524.4	51912.6	-3795.64	55	288	2334
2.511	13085.6	61252.1	-5970	31	247	2754
1.164	2453.41	52.188	-538	6	33	5
0	6824.43	8410	-2171	29	106	519
3.909	25999.3	481586	-12100	88	483	15505
4.429	5128.68	3000.12	-1209.4	42	67	224
4.831	14674.5	79489.9	-6789.49	121	320	3466
0	22631.4	167888	-5381	85	356	5958
2.535	13479.2	90547.2	-5120	45	254	3885
3.322	18254.4	160502	-10300	90	388	6290
3.009	13211.7	50781.2	-3170	34	234	2464
1.219	9192.28	17336.1	-4222.25	35	183	931
4.427	9301.59	28691.7	-3371.9	35	179	1626
0	10043.5	27591	-3517	53	176	1310
0	8495.3	15634	-4086	45	169	932
0	36924.6	1557190	-18151	178	819	34369
0	13089.1	79280	-4448	44	260	3296
2.533	14107.6	55699.1	-4460	33	215	2188
0	15505.6	93179	-7544	53	323	3632
0	9624.16	32837	-4625	195	137	1624
4.434	8203.14	4449.45	-2688.67	30	131	271
1.569	4357.34	2254.9	-996.106	22	54	165
0	21309.3	308967	-11106	99	487	10388
4.829	9543.74	30828.8	-3128.2	91	171	1747
0.931	8769.86	16887.3	-4303.32	35	183	931
4.805	9219.75	30515.1	-3452.94	129	171	1747
3.969	5028.34	1510.35	-736.745	23	51	102
0	6576.86	15744.6	-2460.96	72	118	971
4.795	3416.3	1909.66	-610.946	8	43	161
4.026	16411.4	109322	-6910	52	322	4619
0	25489.3	546061	-17055	58	609	15345
0	8332.77	30412	-4810	29	159	1518
0	12748.2	78968	-5619	31	258	3624
0	13209	116763	-5828	55	313	4728
1.114	5688.74	5146.01	-1830	23	85	343
4.453	10166.4	35546.7	-4347.69	122	208	1691
1.525	6491.18	5285.35	-1260	8	79	292
2.462	21865	468673	-14500	65	483	15505
4.446	8178.44	4565.62	-2668.4	30	131	271
3.677	9301.13	11107	-2902.05	36	156	654
4.564	8880.13	28932	-3451.67	33	179	1626
3.356	2743.05	95.7045	80.7	92	33	5
4.797	13414	95844.9	-5761.78	46	294	4249
0	4501.47	3150	-1831	13	64	246
3.367	4729.27	3297.96	-1195.32	36	71	249
3.726	14318.3	52648.4	-3740	41	234	2464
2.463	4204.62	1920.41	-1085.24	7	63	166
0	6938.7	6583	-3054	28	134	430
4.229	10191.9	35308.3	-4340.29	123	208	1691
4.465	9834.53	35476.7	-4296.77	119	208	1691
3.843	8118.64	12935	-2704.05	15	132	806
3.641	6654.23	8645.74	-2440	21	102	516
2.454	5518.79	4285.92	-731	11	79	317
4.318	14615.8	78989.2	-7356.71	64	320	3466
3.505	12712.8	46402.4	-5926.42	64	273	2061
3.056	9065.21	13786.2	-2965.35	13	148	729
0	9856.84	20391	-4116	22	182	1209
2.776	23306.2	256899	-10200	68	540	8870
0	14748	150755	-11214	244	328	5959
0	7858.98	20495	-4000	46	153	1210
0	8559.59	15566	-3818	84	149	810
0	14253.5	80859	-7864	74	299	3464
4.421	7498.38	26211.7	-2979.97	95	156	1521
0	12648.5	175608	-6053	86	296	7449
4.355	5208.49	4604.75	-1670	24	88	292
2.692	10812.5	50073.9	-4500	20	216	2677
4.794	7790.46	4795.08	-2711.1	33	131	271
4.438	5665.15	2225.74	-1448.77	29	82	185
4.724	11709.7	54376.9	-4344.76	100	209	2534
2.017	5864.98	4202.93	-1410.61	125	88	318
0	9988.74	24152	-5247	67	200	1264
4.496	9275.61	29521.5	-2766.74	82	156	1521
3.018	6747.84	10371.4	-3350	15	109	689
0	7182.97	11307	-1738	25	127	694
4.11	15318.9	96277.6	-5690	60	254	3885
4.706	13151.8	78424.2	-4970	58	272	3539
0	10663	60648	-5207	36	217	2673
0	10140.8	36075	-3985	28	218	1641
4.653	7394.28	9011.31	-1866.45	74	107	517
0	8004.08	7714	-2038	75	126	458
4.155	22559.3	515535	-11551.2	150	540	18067
2.361	15979.5	83480.6	-1930	61	223	2059
0	21859.2	316179	-11335	102	467	10104
3.697	9057.88	23917.4	-2818.99	20	154	1252
3.165	10436	49491.2	-5440	22	216	2677
4.031	5884.35	10842.8	-1887.45	19	102	764
3.006	11292.1	50656.5	-5080	18	216	2677
3.351	11182.7	49091.1	-5140	20	216	2677
3.121	11139.7	28616	-1620	36	166	1414
2.705	12334.8	90901.5	-5890	47	254	3885
4.422	9175.55	14126.5	-2659.8	31	148	729
2.2	17448.5	161929	-7367.33	67	352	6744
4.679	23157.9	279303	-9737.08	67	468	9276
3.546	8593.37	12262.6	-2799.7	89	136	619
0	8394.2	23530	-4726	15	161	1312
2.837	4206.23	1933.1	-1062.75	7	63	166
3.07	24083.3	250216	-9530	94	537	8350
2.418	7256.11	4374.59	-2310	12	86	205
3.121	8179.62	16518.6	-2829.25	77	142	844
1.826	8626.34	25223.7	-3165.86	28	157	1519
2.421	9823.95	42763	-3013.96	97	159	2181
4.669	5715.32	2284.09	-1407.75	14	82	185
0	17112.4	219956	-13390	19	366	8086
3.601	12950	142943	-5270	50	315	5844
4.546	5424.7	1797.18	-1429.71	19	76	147
2.399	5997.32	7042.8	-1643.86	46	93	545
1.484	6457.93	5279.95	-2250	9	79	292
3.781	7226.2	4056.08	-2200.97	65	101	249
0	18551.6	236433	-11996	235	439	8735
3.223	12981.3	78648	-5450	63	272	3539
4	5960.68	11248.8	-1938.34	25	102	764
2.22	10608.2	55531.5	-3900	62	224	2192
4.198	22888.9	516898	-10989	130	540	18067
2.463	11140.6	49305.6	-4310	26	216	2677
4.41	8917.61	38458.3	-3914.55	44	180	2054
3.727	10672.9	39658.5	-3929.78	26	193	2118
3.93	16822.3	111404	-6990	44	322	4619
1.545	11004.7	68489.8	-5152.41	149	247	3373
1.836	4605.12	4243.34	-2160	10	79	317
2.202	5761.34	7513.26	-1807.58	72	104	457
3.041	21315	342133	-4790	99	462	11563
0	11046.1	40932	-3835	43	182	2051
0	12215.5	45237	-6606	53	217	1813
4.947	7104.21	7859.11	-2140	147	109	486
4.946	8577.95	20305.5	-3415.05	79	163	1162
4.62	22931.7	280625	-9585.27	73	468	9276
4.157	6708.7	6613.3	-2160	15	119	395
0	6266.27	6973	-3852	58	98	426
0	14760.8	39741	-3247	37	206	659
2.64	13497.4	51154.5	-4250	40	234	2464
4.353	20950.4	192094	-6900	74	403	6746
0	8392.08	11848.7	-2422.11	9	117	519
0	11071	32766	-5960	29	193	1637
2.523	7892.35	11714.6	-2658.38	86	128	693
4.706	4036.11	1371.04	-971.03	33	51	102
0	13805.7	132816	-8170	38	296	5424
4.362	4891.96	3149.92	-1244.23	51	67	224
3.178	5168.09	4399.88	-1230	23	88	292
4.605	9536.27	27018	-1820	26	166	1414
4.869	3841.49	2210.73	-560.062	5	43	161
4.013	9853.08	32825.5	-3412.71	91	176	1922
4.248	10350.5	51311.8	-2640	18	188	2599
0	12392	111222	-7546	40	310	5318
0	8467.42	16539	-4180	49	149	889
4.278	12669.6	46419.8	-5917.87	55	273	2061
3.937	7884.15	12840	-2703.72	15	132	806
1.277	5259.12	4404	-1840	21	85	343
2.592	7316.05	14012.4	-2389.42	88	120	809
2.971	8709.11	26631.2	-2360	27	156	1364
3.665	14169.2	61001.4	-5040	38	215	2188
3.972	5837.57	7145.25	-1622.43	45	93	545
4.62	5706.75	1701.63	-1365.01	21	76	147
1.677	11542.5	36002.9	-4100	26	234	1581
0	9126.3	24327	-1205	79	175	1360
3.696	10288.3	40039.8	-3260	17	196	1885
3.505	6316.49	7443.83	-1595.74	48	93	545
2.96	10077.4	40387.6	-3110	22	196	1885
2.377	5731.29	7706.91	-1816.5	74	104	457
2.303	14095	59440.8	-6636.81	156	305	2610
0	7581.81	8907	-3860	39	103	428
1.442	3997.74	2174.12	-1109.01	20	54	165
0	6479.81	8759	-2797	23	114	584
0	8999.55	18926	-3351	22	156	1068
2.264	16434.7	161000	-7532.74	66	352	6744
1.267	8827.62	16824	-4256.86	34	183	931
4.169	22538.5	515854	-11626	146	540	18067
4.132	8893.52	20521	-3473.23	93	163	1162
1.572	5416.49	3426.5	-766.079	45	51	132
4.009	11754	60194.2	-3500	44	223	2822
4.908	6190.68	8051.45	-1940	157	109	486
0	10514.7	32425	-5082	17	210	1525
2.6	13623.1	53848.4	-3140	62	224	2192
4.437	9357.75	13461.5	-2820.51	25	148	729
3.807	12991.2	81987.5	-5340	41	272	3539
0	19041.9	226347	-9737	79	397	8735
0	14674.9	150748	-8748	73	398	6070
1.501	3966.63	2179.37	-1116.72	20	54	165
3.295	10390.4	37688.6	-3050	36	196	1997
4.282	12991.3	74328.9	-5536.55	53	262	3211
0	10522.8	29021	-3790	31	206	1418
2.172	3496.01	1290.25	-670.129	33	40	100
2.172	5661.36	7625.5	-1873.76	76	104	457
0	11524.9	61322	-4701	80	203	2671
1.949	5024.23	4206.15	-1170	13	79	317
1.128	9052.64	17210.4	-4296.71	35	183	931
3.125	11539.3	114932	-1790	45	235	4905
0	9844.34	18248	-5575	101	205	939
1.929	11799.1	33557	-974	41	234	1581
3.443	18492.3	160740	-8860	90	388	6290
2.834	6785.53	13299.9	-1551.81	20	96	804
3.516	8115.37	16752.6	-2921.83	79	142	844
2.693	6769.93	10370	-3270	15	109	689
2.49	13688.7	50895.5	-4090	33	234	2464
1.865	16553.4	140389	-11200	97	449	5537
3.156	13760.9	142108	-6186.14	168	308	6057
0	6857.45	4171	-2890	15	100	269
0	21625.9	333010	-11069	101	415	9262
3.98	8861.66	28107.4	-3320	32	166	1414
4.291	8629.8	26660.5	-2720	35	166	1414
3.191	2318.9	50.1853	-522	92	33	5
3.53	18038.5	197109	-8960	49	390	7459
2.349	9941.73	50977	-4330	59	224	2192
0	12703.5	56475	-4502	49	278	2752
4.192	11464.2	56470.8	-4800	48	223	2822
0	8254.06	17259.1	-3144.41	88	142	844
3.288	10780.1	49893.9	-4410	18	216	2677
3.339	11122.9	85167.9	-3070	18	220	3450
4.736	10164.2	22259.2	-2690	37	182	1212
0	7310.28	15253	-2289	57	129	977
1.032	9606.93	17183.8	-4008.93	35	183	931
3.204	7602.64	15173.6	-2715.68	69	134	970
2.738	21107.1	192443	-4860	71	403	6746
4.387	9602.05	38049.9	-3746.45	45	180	2054
3.914	9071.08	11244	-3004.7	28	156	654
0	16308.7	255421	-9490	232	353	9804
4.158	22571.7	515822	-11464.3	137	540	18067
0	9157.57	30701	-5083	44	178	1746
4.892	7728.28	12069.8	-2754.49	83	130	694
1.966	5243.31	4384.34	-1380	17	88	292
4.356	11157.6	52731.2	-3860	53	224	2192
3.859	7813.86	12827.2	-2743.67	15	132	806
0	18881.1	330919	-8165	49	396	11114
4.789	9389.13	30621.6	-3255.9	123	171	1747
2.087	6162.4	7403.12	-1626.62	50	93	545
2.547	9506.32	10088	-2440	40	154	587
4.694	9449.44	38167.3	-3670.58	42	180	2054
2.605	24890.9	275825	-10100	120	537	8350
3.82	9921.12	17437.8	-3818.82	74	172	973
3.206	6476.27	5093.88	-2250.39	49	107	346
3.284	15802.9	110505	-6060	39	322	4619
1.708	10521.7	33117.8	-4430	44	234	1581
3.726	14072.7	99843.5	-5909.66	171	281	4061
1.8	2389.95	65.0214	-309	96	33	5
1.686	11687	36304	-3090	24	234	1581
1.42	5847.75	4834.74	-1190	22	85	343
0	4885.26	7598	-1470	9	88	582
2.236	8836.05	24966.5	-3117.13	33	157	1519
4.646	8641.7	25800.3	-2650	49	156	1364
0	18598.7	182731	-10307	172	356	5539
0	9399.43	10367	-3923	34	159	584
4.624	6618.12	12585.4	-1664.56	39	105	765
0	12407.7	29752	-4475	24	176	1021
2.156	11149.8	37871.4	-3575.04	120	205	1751
1.005	2480.83	52.5249	-625	6	33	5
3.655	9360.19	51489.3	-3090	37	188	2599
0	8707.77	31938	-5842	35	159	1691
1.932	4023.82	2268.91	-1094.2	20	54	165
4.681	6682.57	8567.68	-1640	21	102	516
3.755	24207	256198	-12500	80	540	8870
0	6042.7	3197	-3861	15	127	270
3.869	7842.01	12857.4	-2806.85	15	132	806
1.778	5599.2	3544.91	-769.92	47	51	132
2.089	9034.63	20818.6	-1435.04	0	163	1162
0	14194.4	101990	-6909	33	314	4521
0	14779.6	104331	-7776	49	333	4529
2.244	5720.32	7659.37	-1845.05	72	104	457
1.151	9072.83	17185.7	-4270.5	36	183	931
2.83	9762.67	17428.3	-3835.53	81	172	973
0	9617.97	25660	-3086	26	168	1309
4.982	12909.9	45154.6	-5885.62	57	273	2061
0	8240.49	20802	-4778	32	175	1171
2.358	12418.3	74810.2	-4010	26	249	3630
2.958	11248.6	85695.5	-2720	19	220	3450
0	10224.9	44653	-4063	104	208	2324
0	8464.84	17733	-4715	12	148	850
3.832	7101.88	10461	-2470	20	109	689
2.192	21322.5	171198	-7800	118	449	5537
0	6410.8	7012	-2129	18	113	483
0	7915.85	10808	-2180	27	133	554
4.363	13452	46846.2	-5802.85	66	273	2061
4.404	4901.12	1105.71	-756.547	31	51	102
3.533	9418.5	25769.5	-3342.03	39	174	1415
4.988	14768	79585.3	-6997.85	67	320	3466
0	11571.2	66692	-5682	47	257	3132
2.485	6607.23	12085.7	-1808.59	8	105	765
0	7700.4	18030	-1884	51	138	1024
0	4669.66	3552	-2274	44	75	271
0	10778.3	35403	-4467	167	202	1523
1.61	7813.39	9454.41	-3050.97	100	130	490
2.301	18319.5	161133	-6563.89	77	352	6744
3.028	11032.8	87581.3	-2500	16	220	3450
0	17269.4	144801	-10782	80	397	5853
1.46	10852.6	69867.2	-5398.66	134	247	3373
4.577	9676.17	52338.7	-2500	23	188	2599
3.238	13586.8	92442.1	-4600	74	254	3885
0	10819.3	58753	-4579	40	246	2978
3.832	9712.34	34465.4	-3595.43	70	176	1922
0	15580	115660	-7995	156	333	3634
1.869	19535.4	147409	-9970	65	449	5537
2.066	10816.1	53595.3	-3980	66	224	2192
4.015	6039.22	7258.66	-1584.2	48	93	545
4.592	11691.9	71223.4	-6192.81	33	262	3211
0	5278.68	7006	-1344	5	87	479
3.715	13111.9	79589.1	-4070	49	272	3539
2.704	5867.66	7577.67	-1884.85	67	104	457
4.594	9270.85	38073	-3821.8	38	180	2054
0	7712.93	27308	-2427	38	166	1522
0	13346.2	49372	-3259	53	274	1813
0	10414.9	69386	-4704	74	220	3530
0	13343.3	158569	-7545	29	283	6727
4.129	5675.8	11126.8	-1890.28	28	102	764
0	6631.09	10245	-2231	36	121	619
2.18	12223.5	50867.2	-4990	37	234	2464
4.986	6962.62	8504.54	-1560	19	102	516
0	5928.1	11002	-2326	48	104	764
3.645	9769.64	32445.3	-3482.12	87	176	1922
3.613	9737.96	25849.3	-3397.6	29	174	1415
3.431	13258.4	91207.7	-5420	55	254	3885
0	12799	69920	-6881	63	265	3053
3.052	13571.5	49574.5	-5760	20	215	2188
3.104	9615.24	16937.7	-3927.52	82	172	973
4.591	10105.8	33967.9	-3514.1	95	176	1922
3.556	16563.6	110065	-5100	37	322	4619
3.356	9606.91	26544.1	-2440	13	166	1414
3.14	13204.4	75433.9	-3890	47	264	3217
1.879	4079.57	1479.75	-938.461	41	52	133
0	10380	18576	-3511	21	204	980
0	20207.6	256866	-9971	257	407	8474
2.602	8297.59	25210.3	-3227.74	27	157	1519
4.187	22989.3	515466	-11671.2	144	540	18067
1.933	12462.6	73467.7	-3370	26	249	3630
3.505	13775.9	62344.1	-5810	34	247	2754
4.031	7392.1	4171.09	-2217.93	71	101	249
2.125	9105.82	51150.1	-3780	31	188	2599
0	8066.08	45495	-4864	42	172	2455
[truncated: 14,383 more rows]
